# 1 Effect of pesticides and metals on 2 zebrafish embryo development and 3 larval locomotor activity

---

4

5 **Farooq Ahmad<sup>1,2</sup>, Shaukat Ali<sup>1,3</sup> and Michael K. Richardson<sup>1\*</sup>**

6

7 1. Institute of Biology Leiden (IBL), Leiden University

8 Sylvius Laboratory, Sylviusweg 72, 2333 BE, Leiden, The Netherlands

9 2. Present address: Department of Zoology, The Islamia University of Bahawalpur, Pakistan

10 3. Present address: Department of Zoology, Government College University, Lahore-54000,  
11 Lahore, Pakistan

12 \*Corresponding author: [m.k.richardson@biology.leidenuniv.nl](mailto:m.k.richardson@biology.leidenuniv.nl)

13

14

15

## 16 **Abstract**

17 The zebrafish has been widely used as a predictive model in safety and toxicology. Low cost high-  
18 throughput screening can be achieved with this model, and the genome contains orthologues of the  
19 majority of human disease genes. However, previous studies indicate that the predictivity of the  
20 zebrafish model in toxicology varies between compound and compound class. We examined this issue  
21 by screening 24 compounds from two different compound classes, metals and biocides  
22 (pesticides/insecticides) for toxicity in the zebrafish model and looked at the effects on hatching,  
23 morphology and predictivity for mammalian toxicity. Wild-type zebrafish embryos were exposed to  
24 test compounds in 96-well plates for 96 hours starting at 24 hours post fertilization. Hatching was  
25 either delayed or accelerated depending on the compound. Three types of alteration in behavioural  
26 responses were noted: (i) hypoactivity; (ii) hyperactivity; and (iii) biphasic response (a dose-dependent  
27 shift between hypo- and hyperactivity).  $LC_{50}$  of compounds was calculated and compared to published  
28  $LD_{50}$  values in rodents. The zebrafish-rodent values were poorly correlated for both metals and  
29 biocides. We conclude that, although the zebrafish is a good model for some aspects of toxicology, its  
30 predictivity for mammalian toxicity needs to be determined per compound class.

## 31 **Introduction**

32 The zebrafish is a small, teleost fish of shallow, fresh-water, which has emerged as a valuable model  
33 in the field of research especially in the last decade (1). The advantages which have made it a  
34 popular model in research are manifold and include: external fertilisation and rapid development, low  
35 maintenance costs, easy, year-round spawning, rapid generation cycle (2-3 months), and ease of use  
36 for high-throughput screening (2). Its genome is also nearly completely sequenced and contains  
37 orthologues of 82% of human disease genes (3, 4). The zebrafish is used in many fields of biology  
38 research including behaviour (5-8), chemical toxicity (9-14), drug discovery (15-17) and in human  
39 disease modelling (18-21) by using forward and reverse genetic techniques together with large-scale,  
40 high-throughput screening. However, more information is needed on the predictivity of the zebrafish  
41 model in toxicity, that is, to what extent does the toxicity of compounds tested on zebrafish correlate  
42 with their toxicity in mammals (especially rodents and humans)?

43 Given the aforementioned advantages of the zebrafish, the effects of both short- and long-term  
44 exposure to a wide range of toxins can be studied with relative ease. A variety of compounds has been  
45 tested on zebrafish, and includes metals and organic compounds (22, 23) and mixtures of drugs (24).  
46 The main emphasis in these studies has been on lethality, embryo survival rate and organ  
47 malformation as general assay parameters, and demonstrated that zebrafish exhibit good dose-  
48 responsiveness to toxicity and are a suitable animal model for toxicity screening (14, 25, 26).

49 The use of zebrafish in behavioural neuroscience is in its infancy compared to the use of rodents (27).  
50 However, mutant zebrafish lines, morpholinos, high-throughput screening and new bioassays for toxic  
51 and therapeutic endpoints in zebrafish are likely to become more common. New technology is having  
52 a large impact on research, and this will result in greater insights into the mechanisms of toxicity of  
53 chemicals, as well as aiding in the discovery of new drugs for treating several human diseases (27-29).  
54 Although the number of published studies on zebrafish behaviour is not large compared to comparable  
55 studies on rodents, many of the behaviours displayed by zebrafish are well-described. These include  
56 the open-field test (30, 31), optomotor response (32), optokinetic response (33-37), photokinesis (5)  
57 and visual motor response test (38-40) among many others.

58 It has long been known that behavioural patterns of animals including zebrafish can be altered by  
59 drugs and chemicals (41-43). These alterations are regarded as an observable expression of effects on  
60 nervous and locomotor systems (13). Some of the environmental chemicals, such as pesticides, can  
61 cause developmental neurotoxicity resulting in neurodevelopmental disorders in humans (44, 45). This  
62 makes it important to determine the effects of these chemicals on living animals and their behaviour.

63 Several classes of compound have been tested on zebrafish and assessed for their toxicity prediction in  
64 rodents. The predictivity was found to vary considerably according to compound or compound class

65 (9, 46, 47). In the current study, we have tested metals, pesticides and insecticides (and the latter two  
66 we shall collectively call 'biocides') on zebrafish embryos. We have compared the results with studies  
67 of toxicity of the same compounds in mammals. We chose these compounds because they are very  
68 diverse chemically and because there is increasing awareness and concern regarding the environmental  
69 effects of these compounds (48, 49). For these reasons, the predictivity of the zebrafish in relation to  
70 the toxicity of these compounds in mammals is an important consideration, because it is a potential  
71 test model in environmental toxicology.

## 72 **Material and methods**

### 73 **Statement of ethics on animal use**

74 All experimental procedures were conducted in accordance with The Netherlands Experiments on  
75 Animals Act that serves as the implementation of "Guidelines on the protection of experimental  
76 animals" by the Council of Europe (1986), Directive 86/609/EC, and were performed only after a  
77 positive recommendation of the Animal Experiments Committee had been issued to the license holder.

### 78 **Animal husbandry**

79 Wild-type male and female adult zebrafish (*Danio rerio*) were purchased from Selecta Aquarium  
80 Speciaalzaak (Leiden, The Netherlands) who obtains stock from Europet Bernina International BV  
81 (Gemert-Bakel, The Netherlands). We limited our experiment to AB strain of zebrafish as different  
82 strains have differences in the locomotor activity (50). Fish were kept at a maximum density of 12  
83 individuals in plastic 7.5 L tanks (1145, Tecniplast, Germany) containing a plastic plant as tank  
84 enrichment, in a zebrafish recirculation system (Fleuren & Nooijen, Nederweert, The Netherlands) on  
85 a 14h light: 10h dark cycle (lights on at 7h AM: lights off at 21h PM). Water and air temperature were  
86 maintained at 24 °C and 23 °C, respectively. Fish were purchased at the juvenile stage and were  
87 allowed to adapt to our facility for at least 2 months before being used as adult breeders. The fish were  
88 fed daily with dry food (DuplaRin M, Gelsdorf, Germany) and frozen artemias (Dutch Select Food,  
89 Aquadistri BV, The Netherlands).

90 Zebrafish eggs were obtained by random mating between sexually mature individuals. Briefly,  
91 on the day (16h) before eggs were required, a meshed net allowing eggs to pass through but preventing  
92 adult fish from accessing/eating them, was introduced in the home tank of a group of 12 adult fish.  
93 Each breeding tank was only used once per month to avoid handling stress and ensure optimal eggs  
94 quantity and quality.

95 The eggs were harvested the next day (30 min after the onset of lights at 7h AM) and age was  
96 set as post fertilization day (dpf) 1 based on the staging system employed in the zebrafish text book

97 entitled *Zebrafish: a practical approach* (51). They were placed in 9.2 Petri dish containing 100 ml  
98 egg water (0,21 g/l Instant Ocean Sea Salt and 0,0005% (v/v) methyl blue). 50-60 eggs were place in  
99 one Petri dish in a climate room maintained at a temperature of 28 °C and 50% humidity and under a  
100 light-dark cycle of 14h:10h (lights on at 7h AM/lights off at 9h PM).

## 101 **Zebrafish Egg plating**

102 At 24 hours post fertilization (hpf), all embryos were checked for their natural spontaneous mortality  
103 as there are reports of an early natural death in zebrafish embryos cultured under certain conditions (9,  
104 10). In order to avoid taking embryos during such a die-off, we used 24h old embryos for exposure of  
105 chemicals after removing unfertilized eggs and refreshing the egg water. Thus, each larva was gently  
106 taken up into a plastic Pasteur pipette (VWR International B.V., The Netherlands) and directly  
107 transferred to 96-well plate, one larva per well containing 250 µl egg water (control) or respective  
108 concentration of compound tested. Note that in order to eliminate further sources of disturbance/stress,  
109 the media was not refreshed except on 2dpf where the medium was completely replaced by fresh egg  
110 water and non-fertilized eggs were removed. At the end of the behavioural testing, the larvae were  
111 processed further as follows for morphological assessment.

## 112 **Morphological assessment**

113 Embryos were fixed in 4% paraformaldehyde (PFA) in phosphate-buffered saline at pH 7.2 at 4°C  
114 overnight. They were then rinsed five times in distilled water and dehydrated in a graded series of  
115 ethanol (25, 50, and 70%) for 5 min each. Embryos were rinsed in acid alcohol (1% concentrated  
116 hydrochloric acid in 70% ethanol) for 10 min. They were then placed in filtered Alcian blue solution  
117 (0.03% Alcian blue in acid alcohol) overnight. Embryos were subsequently differentiated in acid  
118 alcohol for 1 h and washed 2x30 min in distilled water. All embryos remained in their original  
119 multiwall plates, so that each individual could be tracked throughout the entire experimental and  
120 analysis procedure. Analysis of embryo morphology was carried out using a dissecting stereo  
121 microscope. The phenotypes of malformations scored are defined in Table 1.

122 **Table 1: Phenotypic endpoints scored in embryos at 5dpf. Some of these criteria have been described elsewhere (52).**

| Phenotype        | Criteria                                                              |
|------------------|-----------------------------------------------------------------------|
| Yolksac          | Yolksac enlarged by fluid accumulation                                |
| Heart            | Pericardial sac enlarged by fluid accumulation                        |
| Meckel cartilage | Meckel cartilage grossly hypoplastic, missing or unfused in midline.  |
| Melanocytes      | Melanocytes aggregate and dispersed                                   |
| Short body       | Body was considered short if its total length was below 3.5mm at 6dpf |
| Tail             | A bent on tail.                                                       |

|           |                                                                                                    |
|-----------|----------------------------------------------------------------------------------------------------|
| Body axis | The trunk was bent on dorso-ventral axis                                                           |
| Normal    | The larvae was considered with normal morphology if any of the above listed phenotypes were normal |

123 **Egg water**

124 Egg water was made from 0.21 g ‘Instant Ocean®’ salt in 1 L of Milli-Q water with resistivity of 18.2  
125 MΩ cm.

126 **Test COMPOUNDS**

127 The compounds used in the present study are listed in the **Error! Reference source not found.**

128 **Table 2: List of compounds used in the study; all compounds were purchased from Sigma (Zwijndrecht, The**  
129 **Netherlands).**

| Compound                                      | Compounds class | Molecular Formula                                                | Molecular weight (g/mol) | Sigma Catalogue number |
|-----------------------------------------------|-----------------|------------------------------------------------------------------|--------------------------|------------------------|
| 1 2,4-                                        | Pesticide       | C <sub>8</sub> H <sub>6</sub> Cl <sub>2</sub> O <sub>3</sub>     | 221.04                   | 31518                  |
| 2 Acephate                                    | Insecticide     | C <sub>4</sub> H <sub>10</sub> NO <sub>3</sub> PS                | 183.2                    | 45315                  |
| 3 Amitrol                                     | Pesticide       | C <sub>2</sub> H <sub>4</sub> N <sub>4</sub>                     | 84.08                    | 45324                  |
| 4 Barium Chloride                             | Metal           | BaCl <sub>2</sub>                                                | 208.23                   | 202738                 |
| 5 Benzophenone                                | Pesticide       | C <sub>13</sub> H <sub>10</sub> O                                | 182.22                   | 427551                 |
| 6 Bromacil                                    | Pesticide       | C <sub>9</sub> H <sub>13</sub> BrN <sub>2</sub> O <sub>2</sub>   | 261.15                   | 45350                  |
| 7 Diamethoate                                 | Insecticide     | C <sub>5</sub> H <sub>12</sub> NO <sub>3</sub> PS <sub>2</sub>   | 229.28                   | 45449                  |
| 8 Diazinon                                    | Insecticide     | C <sub>12</sub> H <sub>21</sub> N <sub>2</sub> O <sub>3</sub> PS | 304.3                    | 45428                  |
| 9 Erbium Chloride                             | Metal           | ErCl <sub>3</sub>                                                | 273.62                   | 449792                 |
| 10 Gallium Chloride                           | Metal           | GaCl <sub>3</sub>                                                | 176.08                   | 427128                 |
| 11 Glyphosate                                 | Pesticide       | C <sub>3</sub> H <sub>8</sub> NO <sub>5</sub> P                  | 16.07                    | 45521                  |
| 12 Hydroquinone                               | Pesticide       | C <sub>6</sub> H <sub>6</sub> O <sub>2</sub>                     | 110.11                   | H9003                  |
| 13 Hexazinone                                 | Pesticide       | C <sub>12</sub> H <sub>20</sub> N <sub>4</sub> O <sub>2</sub>    | 252.32                   | 36129                  |
| 14 Maneb                                      | Pesticide       | C <sub>4</sub> H <sub>6</sub> MnN <sub>2</sub> S <sub>4</sub>    | 265.3                    | 45554                  |
| 15 2-methyl-4-chlorophenoxyacetic acid (MCPA) | Pesticide       | C <sub>9</sub> H <sub>9</sub> ClO <sub>3</sub>                   | 200.62                   | 45555                  |
| 16 Mercuric chloride                          | Metal           | HgCl <sub>2</sub>                                                | 271.50                   | 215465                 |

|    |                     |             |                                                                |        |        |
|----|---------------------|-------------|----------------------------------------------------------------|--------|--------|
| 17 | Methomyl            | Insecticide | C <sub>5</sub> H <sub>10</sub> N <sub>2</sub> O <sub>2</sub> S | 162.21 | 36159  |
| 18 | Molinate            | Pesticide   | C <sub>9</sub> H <sub>17</sub> NOS                             | 187.3  | 36171  |
| 19 | Paraquat dichloride | Pesticide   | C <sub>12</sub> H <sub>14</sub> Cl <sub>2</sub> N <sub>2</sub> | 257.16 | 36541  |
| 20 | Pendimethalin       | Pesticide   | C <sub>13</sub> H <sub>19</sub> N <sub>3</sub> O <sub>4</sub>  | 281.31 | 36191  |
| 21 | Stannic Chloride    | Metal       | SnCl <sub>4</sub>                                              | 189.62 | 204722 |
| 22 | Strontium Chloride  | Metal       | SrCl <sub>2</sub>                                              | 158.53 | 439665 |
| 23 | Triclopyr           | Pesticide   | C <sub>7</sub> H <sub>4</sub> Cl <sub>3</sub> NO <sub>3</sub>  | 256.47 | 32016  |
| 24 | Zinc Chloride       | Metal       | ZnCl <sub>2</sub>                                              | 136.28 | 229997 |

### 130 **Range-finding test**

131 A range-finding test was conducted using a logarithmic series to determine a suitable range of  
132 concentration (0, 1, 10, 100 and 1000 mg/L) as recommended in standard protocols (53). After 24hpf,  
133 zebrafish embryos were checked for the natural mortality and after removing dead embryos, healthy  
134 ones were transferred from Petri dish using a sterile plastic pipette into 96-well microtitre plates. A  
135 single embryo was placed in each well so that dead embryos would not affect others, and also to allow  
136 individual embryos to be tracked for the whole duration of the experiment. We used a static non-  
137 replacement regime without any replacement or refreshment of egg water or test compound. Each well  
138 contained 250 mL of either freshly prepared test compound; egg water (control) or vehicle (egg water  
139 with solvent where mentioned). 16 embryos for each concentration and 16 embryos as controls for  
140 each compound were used.

### 141 **Geometric series and LC<sub>50</sub> determination**

142 A geometric series was selected based on the mortality rate of the range-finding series with  
143 concentrations lying in the range 0-100% mortality. The actual concentrations used are shown in Table  
144 S1. The concentrations were in a geometric series in which each was 50% greater than the next lowest  
145 value as recommended (53). Each compound was tested in triplicate (48 embryos per concentration  
146 and 48 embryos for control and/or vehicle for each compound). LC<sub>50</sub> (expressed in mg/L of egg water)  
147 was determined based on cumulative mortality obtained from three independent experiments at 120  
148 hpf using Regression Probit analysis with SPSS Statistics for windows version 17.0 (SPSS Inc.,  
149 Chicago, USA). The embryos were exposed to the compound for 96 h as in the range finding test. The  
150 LC<sub>50</sub> in mg/L was converted into LC<sub>50</sub> mmol/L to make relative toxicity easier to examine.

### 151 **Hatching and Mortality scoring**

152 Hatching was monitored from 48-72 hpf which is the normal hatching period of zebrafish larvae (54).  
153 The hatching rate was recorded once all the embryos in any particular concentration were hatched.

154 Mortality rate (Table 3) was recorded at 48, 72, 96 and 120 hpf in both logarithmic series and  
 155 geometric series using a dissecting stereomicroscope. Embryos were scored as ‘dead’ if there was no  
 156 locomotor activity, the heart stopped beating and the change in appearance of tissues from a  
 157 transparent to opaque.

158 **Table 3: Cumulative % mortality recorded in 5d larvae after 96 h exposure**

| Cumulative % mortality |                                            |                             |      |       |       |       |                                |        |        |        |        |       |
|------------------------|--------------------------------------------|-----------------------------|------|-------|-------|-------|--------------------------------|--------|--------|--------|--------|-------|
| Compounds              |                                            | Logarithmic series ‡ (mg/L) |      |       |       |       | Geometric series* (mg/L) ± SEM |        |        |        |        |       |
|                        |                                            | 0                           | 1    | 10    | 100   | 1000  | C0                             | C1     | C2     | C3     | C4     | C5    |
|                        | Compounds                                  | 0                           | 1    | 10    | 100   | 1000  | C0                             | C1     | C2     | C3     | C4     | C5    |
| 1                      | 2,4-Dichlorophenoxyacetic                  | 0                           | 0    | 0     | 81.25 | 100   | 0±0                            | 0 ± 0  | 0±0    | 0±0    | 56.25± | 100±0 |
| 2                      | Acephate                                   | 0                           | 0    | 0     | 0     | 0     | 0±0                            | 0±0    | 0±0    | 4±2    | 64±2   | 100±0 |
| 3                      | Amitrol                                    | 0                           | 0    | 0     | 0     | 0     | 0±0                            | 0±0    | 0±0    | 0±0    | 0±0    | 0±0   |
| 4                      | Barium Chloride                            | 0                           | 0    | 0     | 87.5  | 93.75 | 0±0                            | 0±0    | 0±0    | 0±0    | 58±2   | 100±0 |
| 5                      | Benzophenone                               | 0                           | 0    | 0     | 31.25 | 100   | 0±0                            | 60±5   | 100±0  | 100±0  | 100±0  | 100±0 |
| 6                      | Bromacil                                   | 0                           | 0    | 0     | 31.25 | 100   | 0±0                            | 0±0    | 12.5±  | 94±    | 100±0  | 100±0 |
| 7                      | Diamethoate                                | 0                           | 0    | 0     | 6.25  | 100   | 0±0                            | 0±0    | 0±0    | 0±0    | 88±    | 100±0 |
| 8                      | Diazinon                                   | 0                           | 0    | 6.25  | 100   | 100   | 0±0                            | 0±0    | 12.5±  | 100±0  | 100±0  | 100±0 |
| 9                      | Erbium Chloride                            | 0                           | 0    | 6.25  | 100   | 100   | 0±0                            | 0±0    | 0±0    | 0±0    | 96±2   | 100±0 |
| 10                     | Gallium Chloride                           | 0                           | 0    | 0     | 0     | 100   | 0±0                            | 0±0    | 100±0  | 100±0  | 100±0  | 100±0 |
| 11                     | Glyphosate                                 | 0                           | 6.25 | 6.25  | 100   | 100   | 0±0                            | 0±0    | 0±0    | 0±0    | 0±0    | 100±0 |
| 12                     | Hdroquinone                                | 0                           | 0    | 100   | 100   | 100   | 0±0                            | 0±0    | 0±0    | 31±4   | 100±0  | 100±0 |
| 13                     | Hexazinone                                 | 0                           | 0    | 0     | 0     | 100   | 0±0                            | 0±0    | 6.25±  | 62.5±  | 100±0  | 100±0 |
| 14                     | Maneb                                      | 0                           | 0    | 31.25 | 100   | 100   | 0±0                            | 0±0    | 2±2    | 4±4    | 100±0  | 100±0 |
| 15                     | 2-methyl-4-chlorophenoxyacetic acid (MCPA) | 0                           | 6.25 | 6.25  | 100   | 100   | 0±0                            | 0±0    | 0±0    | 6.25±  | 100±0  | 100±0 |
| 16                     | Mercury chloride                           | 0                           | 100  | 100   | 100   | 100   | 0±0                            | 0±0    | 60±2   | 100±0  | 100±0  | 100±0 |
| 17                     | Methomyl                                   | 0                           | 0    | 12.5  | 87.5  | 100   | 0±0                            | 43.75± | 81.25± | 81.25± | 93.75± | 87.5± |
| 18                     | Molinate                                   | 0                           | 0    | 6.25  | 100   | 100   | 0±0                            | 0±0    | 6.25±  | 50±    | 100±0  | 100±0 |
| 19                     | Paraquat                                   | 0                           | 0    | 0     | 0     | 87.5  | 0±0                            | 0±0    | 0±0    | 6.25±  | 100±0  | 100±0 |
| 20                     | Pendimethalin                              | 0                           | 0    | 0     | 0     | 68.75 | 0±0                            | 0±0    | 8±2    | 58±2   | 98±2   | 100±0 |
| 21                     | Strontium Chloride                         | 0                           | 0    | 0     | 0     | 12.5  | 0±0                            | 0±0    | 2±2    | 12±4   | 6±4    | 35±2  |
| 22                     | Tin Chloride                               | 0                           | 0    | 0     | 100   | 100   | 0±0                            | 0±0    | 0±0    | 0±0    | 14±2   | 100±0 |
| 23                     | Triclopyr                                  | 0                           | 0    | 0     | 43.75 | 100   | 0±0                            | 77±2   | 98±2   | 100±0  | 100±0  | 100±0 |
| 24                     | Zinc Chloride                              | 0                           | 0    | 0     | 81.25 | 100   | 0±0                            | 0±0    | 0±0    | 6±4    | 100±0  | 100±0 |

159

160 Key: (‡) This was a one-time range-finding experiment and hence there is no SEM.



161 (\*)= Toxicity of each compound was different with the logarithmic range-finding so a different  
162 geometric scale was used for each compound. The values given are the mean percentage mortality; the  
163 geometric series concentrations are given for each compound in Table S1. N = 48 (3 replications x16)  
164 embryos

## 165 **Automated Behavioural recording**

166 After 96h exposure to the compounds, each 96-well plate was placed in ZebraLab to automatically  
167 record the locomotor activity of larvae with the help of VideoTrack software (both from View Point,  
168 S.A., Lyon, France). A light-emitting diode (LED) panel illuminated the 96-well plate from below.  
169 Recording was done under infrared light which, like the LED panel, is a fixed component of the  
170 ZebraLab system. The white light intensity of the ZebraBox was 500 lux. Locomotor activity was  
171 assessed by a subtraction method used for detection of objects darker than background with a  
172 minimum object size. A threshold of 0.1 mm (minimum distance moved) was used for filtering all of  
173 the data to remove system noise. Locomotor endpoints were designed to express the changes in the  
174 general swimming activity in response to light-dark stimulus.

175 A short test comprising of 14 minutes, called ‘visual motor response test’ was performed at 6 dpf as  
176 described elsewhere (55). All experiments were done at optimum temperature of  $28 \pm 0.5^\circ\text{C}$ . The  
177 visual motor response test has been previously used as frequently alternating periods of light and dark  
178 for a very short duration (not more than 10 minutes). This test is used to check abrupt change of  
179 locomotor activity (also called as visual startle response) after sudden shift from light to dark (38, 55-  
180 57). The experimental recording protocol consisted of three phases. First two minutes were given in  
181 the ZebraLab to acclimatize in the new environment. This phase was necessary to make sure that basal  
182 locomotor activity of zebrafish larvae is without any bias resulting in handling of the plate or change  
183 of location and hence was not used in the further analysis. After this acclimatization, the basal phase  
184 started, and consisted of 4 minutes to measure the basal locomotor activity while light in the ZebraLab  
185 remained ON. Immediately after basal phase, the lights were suddenly turned off for 4 min to record  
186 sudden change of locomotor activity which is called as ‘challenge phase’. Behavioural activity in the  
187 dark was also automatically recorded during this period with the help of infrared light. A third phase  
188 called ‘recovery phase’ was started immediately for 4 min after challenge phase to give zebrafish  
189 larvae time to recover from shock of darkness. All three phases consisted of 4-min to prevent  
190 habituation, and also to obtain more robust responses.

## 191 **Endpoint**

192 Total distance moved for each minute during the 14 minute period was recorded. Average distance  
193 moved was calculated in all 3 phases i.e. basal, challenge and recovery.

## 194 **Statistical analysis**

195 Statistical analyses were performed using GraphPad Prism version 5.04 for Windows, GraphPad  
196 Software, San Diego California USA, [www.graphpad.com](http://www.graphpad.com). One-way ANOVA was performed to  
197 analyse effect of various compounds on hatching rate and effect of compounds on locomotor activity.  
198 A Dunnett's post hoc test was used to analyse multiple comparisons.

## 199 **Results**

### 200 **Hatching percentage**

201 The hatching percentage was monitored from 48-72 hpf which is the normal hatching period (54). We  
202 divided the effects of compounds on hatching into three categories after doing one-way ANOVA  
203 followed by Dunnett's multiple comparison test: (i) compounds which have no significant effect on  
204 hatching, namely 2,4-Dichlorophenoxyacetic acid [ $F_{(4,10)}=0.75$ ,  $p=0.5801$ ], MCPA [ $F_{(3,8)}=1.0$ ,  
205  $p=0.4411$ ], barium chloride [ $F_{(5,12)}=0.8$ ,  $p=0.5705$ ], hexazinone [ $F_{(5,12)}=0.84$ ,  $p=0.5464$ ] and strontium  
206 chloride [ $F_{(5,12)}=2.4$ ,  $p=0.0994$ ] (Figure 1); (ii) compounds which delayed hatching, namely dimethoate  
207 [ $F_{(5,12)}=1029$ ,  $p<0.0001$ ], benzophenone [ $F_{(2,6)}=422.3$ ,  $p<0.0001$ ], triclopyr [ $F_{(2,6)}=558.3$ ,  $p<0.0001$ ],  
208 pendimethalin [ $F_{(5,12)}=406.2$ ,  $p<0.0001$ ], mercuric chloride [ $F_{(2,6)}=484$ ,  $p<0.0001$ ], stannic chloride  
209 [ $F_{(5,12)}=795$ ,  $p<0.0001$ ], maneb [ $F_{(2,6)}=993.5$ ,  $p<0.0001$ ], hydroquinone [ $F_{(3,8)}=400$ ,  $p<0.0001$ ],  
210 acephate [ $F_{(4,10)}=527.2$ ,  $p<0.0001$ ], gallium chloride [ $F_{(2,6)}=2257$ ,  $p<0.0001$ ], erbium chloride  
211 [ $F_{(5,12)}=253.2$ ,  $p<0.0001$ ], diazinon [ $F_{(4,10)}=475$ ,  $p<0.0001$ ], molinate [ $F_{(5,12)}=417.3$ ,  $p<0.0001$ ], zinc  
212 chloride [ $F_{(5,12)}=950.7$ ,  $p<0.0001$ ] and bromacil [ $F_{(4,10)}=975.8$ ,  $p<0.0001$ ] (Figure 2); (iii) compounds  
213 which accelerated hatching, namely methomyl [ $F_{(6,14)}=484$ ,  $p<0.0001$ ], glyphosate [ $F_{(2,6)}=206$ ,  
214  $p<0.0001$ ], paraquat [ $F_{(4,10)}=18.79$ ,  $p<0.0001$ ], and amitrol [ $F_{(6,14)}=205.9$ ,  $p<0.0001$ ] (Figure 3).

215 **Figure 1. Hatching percentage after exposure to compounds that caused dose-dependent delay in hatching (as**  
216 **indicated by percent survivors hatched at 72hpf).**

217 **Figure 2: Hatching percentage after exposure to compounds that caused dose-dependent acceleration of hatching (as**  
218 **indicated by percent survivors hatched at 48hpf)**

219 **Figure 3. Hatching percentage after exposure to compounds that had no effect on hatching at 72hpf.**

220

### 221 **Malformations**

222 The malformations produced by the test compounds are summarized in Table 4. The features which  
223 were examined are yolk sac oedema, pericardial oedema, bent body, total length of the zebrafish  
224 larvae and pigmentation over the body. The compounds producing malformations in survivors were:  
225 Glyphosate, 2,4-Dichlorophenoxyacetic acid, diazinon, paraquat, methomyl and molinate (Table 4.)  
226 Mercuric chloride, gallium chloride and benzophenone produced lethality at all concentrations tested

227 and hence malformations in survivors were not observed. The remaining compounds did not produce  
 228 any of the malformations described in Table 1.

229 **Table 4 : Malformations produced by varying concentrations (geometric series) of test compounds.**

| Compounds |                                            | C0 | C1            | C2              | C3                 | C4          | C5        |
|-----------|--------------------------------------------|----|---------------|-----------------|--------------------|-------------|-----------|
| 1         | 2,4-Dichlorophenoxyacetic                  | 0  | DP            | DP              | DP, BT             | DP, BT      | X         |
| 2         | Acephate                                   | 0  | 0             | 0               | 0                  | 0           | X         |
| 3         | Amitrol                                    | 0  | 0             | 0               | 0                  | DP          | DP        |
| 4         | Barium chloride                            | 0  | 0             | 0               | BB                 | PE, BB      | X         |
| 5         | Benzophenone                               | 0  | YSE, DP       | X               | X                  | X           | X         |
| 6         | Bromacil                                   | 0  | 0             | 0               | 0                  | X           | X         |
| 7         | Diamethoate                                | 0  | 0             | 0               | 0                  | 0           | X         |
| 8         | Diazinon                                   | 0  | SB, YSE, DP   | SB, YSE, DP, PE | X                  | X           | X         |
| 9         | Erbium Chloride                            | 0  | 0             | 0               | SB                 | X           | X         |
| 10        | Gallium chloride                           | 0  | NH, DP        | X               | X                  | X           | X         |
| 11        | Glyphosate                                 | 0  | SB, YSE, DP   | SB, YSE, DP     | SB, YSE, DP        | SB, YSE, DP | X         |
| 12        | Hexazinone                                 | 0  | 0             | DP, YSE         | DP, YSE            | X           | X         |
| 13        | Hydroquinone                               | 0  | DP            | DP              | DP                 | X           | X         |
| 14        | Maneb                                      | 0  | 0             | PE              | PE                 | X           | X         |
| 15        | 2-methyl-4-chlorophenoxyacetic acid (MCPA) | 0  | 0             | 0               | 0                  | X           | X         |
| 16        | Mercury chloride                           | 0  | PE            | X               | X                  | X           | X         |
| 17        | Methomyl                                   | 0  | SB, DP, PE, * | SB, DP, *       | SB, DP, *          | SB, DP, *   | SB, DP, * |
| 18        | Molinate                                   | 0  | 0             | DP, YSE         | DP, YSE            | X           | X         |
| 19        | Paraquat                                   | 0  | DP, *         | SB, BT, YSE, *  | SB, BT, YSE, DP, * | X           | X         |
| 20        | Pendimethalin                              | 0  | 0             | 0               | 0                  | 0           | X         |
| 21        | Stannic chloride                           | 0  | 0             | 0               | 0                  | DP          | X         |
| 22        | Strontium chloride                         | 0  | 0             | 0               | 0                  | 0           | 0         |
| 23        | Triclopyr                                  | 0  | SB            | SB, BT          | X                  | X           | X         |
| 24        | Zinc chloride                              | 0  | 0             | YSE             | YSE                | X           | X         |

230 **Keys: X = dead; 0 = No observed malformation; SB = short body; DP = dispersed pigmentation; YSE = Yolk sac**  
 231 **oedema; PE = pericardial oedema; BT = bent tail; NH = not hatched**

232 \*= these embryos typically moved for a brief movement with signs of shivering on being touched.

### 233 LC<sub>50</sub> value calculation and correlation with LD<sub>50</sub> values of rodents

234 The LC<sub>50</sub> values of zebrafish larvae determined after 96 h exposure to test compounds, and their  
 235 corresponding LD<sub>50</sub> values in rodents taken from the literature, are shown in Table 5. No correlation  
 236 was found between the zebrafish and rodent values. Thus, a correlation test produced spearman's rank  
 237 correlation of -0.08498 (p=0.6999) and Pearson's correlation -0.1086 (p=0.6218) between zebrafish  
 238 embryo LC<sub>50</sub> and rodent LD<sub>50</sub> values.

239 **Table 5: Zebrafish embryo LC<sub>50</sub> values calculated in present study, and the corresponding rodent LD<sub>50</sub> oral values**  
 240 **based on the literature**

| Compounds |                                            | Zebrafish embryo LC <sub>50</sub> (mg/L ±SEM) | Zebrafish embryo LC <sub>50</sub> (mmol/L) | Rodent LD <sub>50</sub> (mg/kg) | Rodent LD <sub>50</sub> (mmol/kg) |
|-----------|--------------------------------------------|-----------------------------------------------|--------------------------------------------|---------------------------------|-----------------------------------|
| 1         | 2,4-Dichlorophenoxyacetic                  | 65.3±0.41                                     | 0.29±0.030                                 | 370(#)                          | 1.67                              |
| 2         | Acephate                                   | 5489.31±16.93                                 | 29.97±0.09                                 | 233(*)                          | 1.27                              |
| 3         | Amitrol                                    | ND                                            | ND                                         | 11000(*)                        | 130.83                            |
| 4         | Barium Chloride                            | 135.35±3.26                                   | 0.65±0.03                                  | 132(*)                          | 0.63                              |
| 5         | Benzophenone                               | 89.28±18.74                                   | 0.49±0.12                                  | 2895(*)                         | 15.89                             |
| 6         | Bromacil                                   | 270.2±0.67                                    | 1.03±0.071                                 | 5175(*)                         | 19.82                             |
| 7         | Diamethoate                                | 684.3±2.04                                    | 2.97±0.002                                 | 60(*)                           | 0.26                              |
| 8         | Diazinon                                   | 27.5±0.38                                     | 0.09±0.024                                 | 96(*)                           | 0.32                              |
| 9         | Erbium Chloride                            | 101.24±0.66                                   | 0.37±0                                     | 4417(Φ)                         | 16.14                             |
| 10        | Gallium Chloride                           | 334.55±1.17                                   | 1.90±0.01                                  | 4700(*)                         | 26.69                             |
| 11        | Glyphosate                                 | 95.9±0.23                                     | 0.56±0.008                                 | 1568(*)                         | 9.27                              |
| 12        | Hdroquinone                                | 4.40±0.33                                     | 0.04±0                                     | 245(*)                          | 2.23                              |
| 13        | Hexazinone                                 | 361.8±0.57                                    | 1.43±0.013                                 | 1690(*)                         | 6.7                               |
| 14        | Maneb                                      | 42.45±0.35                                    | 0.16±0                                     | 2600(*)                         | 9.80                              |
| 15        | 2-methyl-4-chlorophenoxyacetic acid (MCPA) | 47.2±0.3                                      | 0.23±0.010                                 | 550(*)                          | 2.74                              |
| 16        | Mercuric chloride                          | 0.27±0.00                                     | 0.001±0                                    | 6(⌘)                            | 0.02                              |
| 17        | Methomyl                                   | 59.7±0.39                                     | 0.367±0.030                                | 10(*)                           | 0.06                              |

|    |                    |               |             |         |       |
|----|--------------------|---------------|-------------|---------|-------|
| 18 | Molinate           | 49.2±0.43     | 0.26±0.016  | 530(*)  | 2.83  |
| 19 | Paraquat           | 500.8±0.70    | 1.94±0.034  | 120(*)  | 0.47  |
| 20 | Pendimethalin      | 376.96±1.06   | 1.34±0.01   | 1340(*) | 4.76  |
| 21 | Stannic Chloride   | 25841.98±2.30 | 0.81±0.01   | 46(*)   | 0.18  |
| 22 | Strontium Chloride | 211.02±28.57  | 163.01±0.26 | 1874(☼) | 11.82 |
| 23 | Triclopyr          | 69.24±0.17    | 0.27±0      | 729(*)  | 2.84  |
| 24 | Zinc Chloride      | 89.96±2.02    | 0.66±0.02   | 350(*)  | 2.57  |

241 **Keys:**

242 **ND= Not determined**

243 **(\*) = from Hazardous Substances Data Bank at <http://toxnet.nlm.nih.gov>**

244 **(#) = from Extension Toxicology Network at <http://extoxnet.orst.edu>**

245 **(♣) = from ChemIDplus Advanced at <http://chem.sis.nlm.nih.gov/chemidplus/cas/10138-41-7>**

246 **(⌘) = from Material Safety Data Sheet at <http://avogadro.chem.iastate.edu/MSDS/HgCl2.htm>**

247 **(☼) = from <http://www.guidechem.com/msds/10025-70-4.html>**

248 The relative toxicity ( $[\text{zebrafish LC}_{50} \text{ mmol/L}] \div [\text{rodent LD}_{50} \text{ mmol/kg}]$ ) of individual compounds is  
249 shown in Figure 4. Compounds which were less toxic in zebrafish than in rodents include bromacil,  
250 dimethoate, diazinon, glyphosate, hexazinone, MCPA, molinate, 2,4-Dichlorophenoxyacetic acid,  
251 acephate, barium chloride, benzophenone, erbium chloride, gallium chloride, hydroquinone, maneb,  
252 mercuric chloride, pendimethalin, triclopyr and zinc chloride. The compounds which were more toxic  
253 in zebrafish than in rodents were methomyl, paraquat, strontium chloride and stannic chloride.

254 **Figure 4: Relative toxicity of individual compounds tested in this study. Zebrafish embryo LC<sub>50</sub> was determined**  
255 **based on cumulative mortality after 96 h exposure of compounds from three independent experiments and rodent**  
256 **LD<sub>50</sub> was taken from the literature.**

## 257 **Locomotor activity**

258 The visual motor response test was used to assess the integrity of the central and peripheral nervous  
259 system together with visual and musculoskeletal system development. On the basis of the visual motor  
260 response test, four distinct responses were found as follows:

### 261 **Monotonic stimulation response**

262 One-way ANOVA followed by Dunnett's test for multiple comparisons showed that the locomotor  
263 activity of zebrafish larvae in the challenge phase was significantly increased (Figure 5). The  
264 compounds which showed monotonic stimulation response were: paraquat [ $F_{(3,58)}=7.439$ ,  $p<0.001$ ],  
265 stannic chloride [ $F_{(3,58)}=4.981$ ,  $p=0.0038$ ] and amitrol [ $F_{(5,89)}=4.155$ ,  $p<0.001$ ].

266 **Figure 5: Distance moved during the challenge phase of the visual motor response test by zebrafish larvae at 5dpf. All**  
267 **these compounds displayed a significant concentration-dependent increase in distance moved. Error bars represent**

268 ±SEM of N=48 control and survived embryos for each concentration of each compound from three independent  
269 experiments. Statistical icons: \*= $p<0.05$ , \*\*= $p<0.01$  and \*\*\*= $p<0.001$

270

### 271 **Monotonic suppression response**

272 One-way ANOVA test followed by Dunnet's post hoc test for multiple comparisons showed that an  
273 increase in the concentration of the compounds caused suppression of locomotor activity (Figure 6).  
274 The locomotor activity of zebrafish larvae was significantly decreased in the challenge phase as  
275 compared to controls. The compounds with monotonic suppression were: strontium chloride  
276 [ $F_{(5,78)}=37.90$ ,  $p<0.0001$ ], zinc chloride [ $F_{(3,53)}=7.506$ ,  $p<0.001$ ], pendimethaline [ $F_{(3,48)}=28.13$ ,  
277  $p<0.0001$ ], diazinon [ $F_{(2,42)}=5.267$ ,  $p<0.001$ ], hexazinone [ $F_{(3,49)}=16.08$ ,  $p<0.0001$ ], methomyl  
278 [ $F_{(3,27)}=25.75$ ,  $p<0.0001$ ], molinate [ $F_{(3,51)}=20.61$ ,  $p<0.0001$ ], dimethoate [ $F_{(3,60)}=13.31$ ,  $p<0.0001$ ] and  
279 barium chloride [ $F_{(4,63)}=10.80$ ,  $p<0.0001$ ].

280 **Figure 6. Distance moved during the challenge phase of the visual motor response test by zebrafish larvae at 5dpf.**  
281 **These compounds showed a significant concentration-dependent decrease in the locomotor activity. Error bars**  
282 **represent ±SEM of N=48 control and survived embryos for each concentration of each compound from three**  
283 **independent experiments. Statistical icons: \*= $p<0.05$ , \*\*= $p<0.01$  and \*\*\*= $p<0.001$**

### 284 **Biphasic response (dose dependent stimulation and suppression)**

285 One-way ANOVA test followed by Dunnet's post hoc test for multiple comparisons showed a  
286 significant difference in the locomotor activity of some compounds, at certain concentrations tested,  
287 and controls (Figure 7). In these cases, the locomotor activity increased with increasing concentration,  
288 and then decreased at yet higher concentrations. The compounds with this biphasic response were  
289 erbium chloride [ $F_{(3,58)}=20.28$ ,  $p<0.0001$ ], 2,4-Dichlorophenoxyacetic acid [ $F_{(4,66)}=9.143$ ,  $p<0.0001$ ]  
290 and hydroquinone [ $F_{(3,56)}=12.58$ ,  $p<0.0001$ ].

291 **Figure 7: Distance moved during the challenge phase of the visual motor response test by zebrafish larvae at 5dpf.**  
292 **These compounds showed a significant concentration-dependent increase and then a decrease at a high concentration**  
293 **in the locomotor activity. Error bars represent ±SEM of N=48 control and survived embryos for each concentration of**  
294 **each compound from three independent experiments. Statistical icons: \*= $p<0.05$ , \*\*= $p<0.01$  and \*\*\*= $p<0.001$**

### 295 **No effect**

296 For some compounds, the locomotor activity of zebrafish larvae was unaffected, regardless of  
297 concentration tested (Figure 8). One-way ANOVA test followed by Dunnet's post hoc test for multiple  
298 comparisons showed no significant difference in the locomotor activity between the various  
299 concentrations of compounds. The compounds without any effect on the locomotor activity were:  
300 maneb [ $F_{(3,55)}=2.26$ ,  $p=0.0908$ ], glyphosate [ $F_{(4,73)}=0.5964$ ,  $p=0.6664$ ], MCPA [ $F_{(3,59)}=2.272$ ,  
301  $p=0.0895$ ] and bromacil [ $F_{(2,42)}=2.154$ ,  $p=0.1287$ ].

302 **Figure 8. Distance moved during the challenge phase of the visual motor response test by zebrafish larvae at 5dpf.**  
303 **These compounds showed no significant difference in locomotor response as compared to control. Error bars**  
304 **represent ±SEM of N=48 control and survived embryos for each concentration of each compound from three**  
305 **independent experiments. Statistical icons: \*= $p<0.05$ , \*\*= $p<0.01$  and \*\*\*= $p<0.001$**

## 306 Discussion

### 307 Hatching

308 The first significant finding in the present study is that the differential hatching percentage depends on  
309 the compound tested. Hatching is an essential step in zebrafish development, and delayed hatching  
310 makes zebrafish more susceptible to predators; complete inhibition of hatching may also result in  
311 death (58). We found that the time of hatching is influenced by compound type, and by concentration.  
312 Many compounds tested resulted in delayed hatching (compared to controls). However, four  
313 compounds were associated with accelerated hatching, namely: amitrol, methomyl, paraquat and  
314 glyphosate. With amitrol, lower concentrations delayed hatching, while higher concentrations  
315 accelerated it. By contrast, lower concentration of paraquat did not have effect on hatching while  
316 higher concentrations accelerated the hatching as compared to control larvae. The higher  
317 concentrations of methomyl and glyphosate also accelerated the hatching. Fourteen compounds out of  
318 the 24 tested had no significant effect on the hatching rate.

319 Hatching in zebrafish takes place in two steps. The first step is the release of hatching enzyme by the  
320 hatching gland which breaks down the inner vitelline envelope of the acellular chorion (59). The  
321 second step is the spontaneous movement of the embryo which starts around 19hpf until the hatching.  
322 The delayed hatching in the present case might be due to delay in the release of hatching enzyme or a  
323 delay in the spontaneous movement activity. The other explanation lies in the presence of chorion  
324 around the zebrafish embryo. The 3.5  $\mu\text{m}$  thick chorion (60) protects the zebrafish embryo against the  
325 toxic effects of compounds (61), and acclimation of different toxins (62). It is even possible that  
326 delayed hatching might allow the embryo to survive short-term exposure of compounds, which would  
327 have killed the hatched (non-chorion-protected) larvae.

328 It remains to be elucidated how these chemicals can accelerate or inhibit the hatching process, and  
329 what the ecological consequences might be in the wild. However, this phenomenon shows that the  
330 embryo can react to chemicals at concentrations at which larval survival is not affected. Although the  
331 mechanism and consequences of delayed or accelerated hatching are unknown, it is possible that  
332 hatching time may serve as a sublethal response variable for embryonic development in toxicity tests.  
333 Further work is required to examine these issues.

### 334 Morphological malformations

335 It has been found that the physical properties of chemicals did not fully predict lethality or  
336 developmental outcomes; rather, individual outcomes such as pericardial oedema and yolk sac oedema  
337 are more reliable indicators of developmental toxicity (22). Thus, in order to see the teratogenic effects  
338 of compounds, we screened for malformations. It was found that 29% (7/24) of the compounds

339 produced none of the morphological abnormalities in the zebrafish embryos described in Table 1 at  
340 any concentration. By contrast, 71% (17/24) compounds produced various malformations  
341 summarized in Table 4. The most common abnormality in these larvae was dispersed pigmentation on  
342 the body; this is considered an indication of stress (63). The compounds 2,4-Dichlorophenoxyacetic  
343 acid, paraquat and barium chloride produced axial curvature and deformed or bent tail. It has been  
344 suggested that these types of malformation might be due to delayed hatching (64), a conclusion  
345 consistent with the results of the present study.

346 Acephate, amitrol, strontium chloride, stannic chloride, bromacil, dimethoate, MCPA and erbium  
347 chloride caused no morphological deformities at any concentration. By contrast, diazinon, glyphosate,  
348 hexazinone, methomyl, molinate, 2,4-Dichlorophenoxyacetic acid were among the most teratogenic  
349 compounds tested resulting in multiple malformations. Benzophenone, gallium chloride and mercuric  
350 chloride simply produced lethality.

### 351 **LC<sub>50</sub> of zebrafish vs. LD<sub>50</sub> of rodents**

352 In the present study, the correlation between LC<sub>50</sub> of zebrafish and LD<sub>50</sub> of rodents was very weak for  
353 metals and biocides considered together (R<sup>2</sup>=0.1456). We compared the LC<sub>50</sub> of zebrafish with oral  
354 LD<sub>50</sub> in rodents taken from the literature. Where data were available from more than rodent species,  
355 we did not take the average, but used a single value from one study.

356 The difference we find between LC<sub>50</sub> of compounds in zebrafish and oral LD<sub>50</sub> in rodents can be  
357 explained by various factors. The first factor is that we are comparing the developmental toxicity of a  
358 compound in the zebrafish embryo versus a rodent adult. Thus we are comparing different life stages.  
359 Secondly, the route of exposure should also be taken into account. In case of the zebrafish embryos,  
360 we exposed chronically to compound for 96 h beginning at 24hpf. In the early part of this period, there  
361 is a relatively impermeable chorion (3.5 µm thick, composed of three acellular layers) surrounding the  
362 embryo (60). After hatching, the drug could, in principle, be absorbed through the skin, taken up by  
363 the gills, or absorbed from the pharynx or gut. Little is known about the absorption of drugs by  
364 zebrafish embryos. In the case of the rodent studies used here for comparison, compounds were  
365 administered orally. An important issue for futures studies using the zebrafish embryo model is to  
366 examine the route of absorption of compounds from the environment and to compare it with  
367 absorption in rodents and other mammals from the digestive tract or other routes.

368 It has been reported that zebrafish LC<sub>50</sub> values of a variety of compounds correlate well with the  
369 corresponding LD<sub>50</sub> values in rodents (9, 65) and birds (66). On this basis, it has been suggested that  
370 zebrafish embryos/larvae are a good alternative method for developmental toxicity studies (67).  
371 However, it has also been emphasised that special care should be taken in considering predictivity  
372 because this parameter varies with the class of compounds (9). The authors showed that the slope of



373 the regression line (zebrafish LC<sub>50</sub> vs. rodent LD<sub>50</sub>) varied from 0.36 to 1.27 depending on the  
374 compound class. In another study, Parng and colleagues (65) showed that LC<sub>50</sub> values of 11 out of 18  
375 compounds were correlated with the LD<sub>50</sub> values of those compounds in mice. Together, these studies  
376 suggest that the predictivity of the zebrafish embryo model is critically dependent on compound class.

377 Another example of comparative toxicology in the zebrafish model (68) used multiple approaches to  
378 study cell cycle inhibition of various compounds. Zebrafish embryos were tested to screen 16,320  
379 compounds to assess the level of serine-10-phosphorylated-histone 3. They also tested 17 known  
380 chemicals which can disrupt the cell cycle in mammals, and found that 9 out of 17 compounds were  
381 positive. The other 8 chemicals were active in the *in vitro* AB9 zebrafish fibroblast culture preparation  
382 making a total of 94% of tested compounds that were active in zebrafish assays. Thus, the authors  
383 concluded (68) that the drug target conservation between zebrafish and mammals is very high.

384 In summary, our results, together with other studies, suggest that although the zebrafish embryo is a  
385 valid alternative/complimentary model in toxicity studies, its use as a surrogate to predict rodent and  
386 human acute toxicity can depend strongly on the compound type.

### 387 **Locomotor activity**

388 In order to see the effect of compound type on locomotor activity, we used the visual motor response  
389 test at 5dpf. This test has previously proved effective as a simple locomotor behaviour test for  
390 assessing effects of compounds. (38, 40, 42, 55, 69). We chose larvae at 5dpf, a time point at which  
391 they display a wide range of behavioural repertoires, and at which many organs are differentiated (70).

392 A number of compounds that we tested showed a significant concentration-dependent suppression of  
393 locomotor activity in the visual motor response test. These include agents that have a comparable  
394 effect in rodents. Pendimethalin and methomyl suppressed the locomotor activity in the zebrafish larvae  
395 in the present study, and also in rodents (71, 72). The effect of a few compounds on the locomotor  
396 activity of rodents and zebrafish larvae is shown in Table 6.

397 **Table 6: Comparison of effects of selected compounds on zebrafish and rodents locomotor activity. The effect on**  
398 **zebrafish larvae are derived from the present study while the effect on rodent is derived from the literature.**

| <b>Compound</b> | <b>Effect of compound on zebrafish locomotor activity in present study</b> | <b>Effect of compound on rodent locomotor activity (from literature)</b> | <b>References</b> |
|-----------------|----------------------------------------------------------------------------|--------------------------------------------------------------------------|-------------------|
| Pendimethalin   | Decreased                                                                  | Decreased                                                                | (71)              |

|                           |           |           |      |
|---------------------------|-----------|-----------|------|
| Methomyl                  | Decreased | Decreased | (72) |
| Dimethoate                | Decreased | Decreased | (80) |
| Hydroquinone              | Decreased | Decreased | (77) |
| 2,4-Dichlorophenoxyacetic | Decreased | Decreased | (78) |
| Paraquat                  | Increased | Increased | (81) |
| Maneb                     | No effect | Decreased | (82) |

399

400 On the other hand, some compounds increased the locomotor activity in the challenge phase as  
401 compared to controls in our study. Specifically, zebrafish larvae treated with amitrol, stannic chloride  
402 and paraquat showed hyperactivity in a concentration dependent manner. Paraquat-induced toxicity  
403 has been linked to Parkinson's-like neurological degenerative mechanisms both in rats (73) and in  
404 zebrafish (74). It is possible that the hyperactivity of zebrafish larvae recorded in this study in the  
405 challenge phase was due to Parkinson-like tremors. Further work is required to examine this  
406 possibility.

407 Some compounds in this study showed a biphasic effect, that is, either stimulation or suppression of  
408 locomotor activity depending on the concentration. For example, erbium chloride, hydroquinone and  
409 2,4-dichlorophenoxyacetic acid increased the locomotor activity in a concentration dependent manner  
410 at lower concentrations, but suppressed it at higher concentrations. A biphasic response has also been  
411 observed in rodents following exposure to toluene (75) and ethanol (76). Hydroquinone in rodents has  
412 been known to decrease locomotor activity (77). Similarly, 2,4-dichlorophenoxyacetic acid is also  
413 known to decrease the spontaneous locomotor activity in rats, contrary to our results where it was  
414 increased initially before decreasing at higher dose (78). Possible explanations for the different  
415 responses in zebrafish in this study, compared to the rodent literature, could include the different route  
416 of exposure, as well as different concentrations in the tissues. Again, these findings emphasise the  
417 need for comparative studies of absorption of compounds in the zebrafish embryo.

418 When exposing zebrafish embryos to toxicants, there are several possible mechanisms for the effect on  
419 locomotor behaviour. For example, the toxicant could cause retarded development of the locomotor  
420 and nervous systems, and the latter could include visual impairment. Visual impairment has been  
421 implicated in the effects of ethanol on zebrafish because it causes abnormalities of eye development  
422 (i.e. microphthalmia; see (55)).

423 Hypoactivity can also be attributed to other malformations (79). However, the presence of  
424 malformations cannot explain the hypoactivity seen in the present study after treatment with  
425 pendimethalin, strontium chloride and dimethoate, in which no malformations were present. In

426 contrast, we found that larvae exposed to glyphosate were severely malformed but showed no  
427 difference in locomotor activity. In conclusion, there are multiple factors which can contribute to the  
428 hyper- or hypoactivity in the zebrafish larvae and a single factor cannot explain all the variations in  
429 locomotion.

## 430 **Conclusion**

431 We have shown that different classes and even different compounds within the same class produce a  
432 range of different effects on zebrafish. Hatching was either delayed or accelerated depending on the  
433 compound, and the compounds produced varying malformations during development at difference  
434 concentrations. Zebrafish larvae showed three types of behavioural responses: (i) hypoactivity; (ii)  
435 hyperactivity; and (iii) biphasic response (a dose-dependent shift between hypo- and hyperactivity).  
436 When  $LC_{50}$  values of compounds were compared to published  $LD_{50}$  values in rodents, they showed  
437 poor correlation. It can be suggested that although the zebrafish embryo model has been embraced by  
438 wide scientific community as an alternative model for screening the developmental toxicity potential  
439 of compound, its predictivity for mammalian toxicity needs to be determined per compound class.  
440 More work is required to draw a general conclusion about predictive power of zebrafish model.

## 441 **References**

- 442 1. Spence R, Gerlach G, Lawrence C, Smith C. The behaviour and ecology of the zebrafish, *Danio*  
443 *rerio*. *Biological Reviews*. 2008;83(1):13-34.
- 444 2. Dahm R, Geisler R. Learning from small fry: The zebrafish as a genetic model organism for  
445 aquaculture fish species. *Mar Biotechnol (NY)*. 2006;8(4):329-45.
- 446 3. Hill AJ, Teraoka H, Heideman W, Peterson RE. Zebrafish as a model vertebrate for  
447 investigating chemical toxicity. *Toxicol Sci*. 2005;86(1):6-19.
- 448 4. Howe K, Clark MD, Torroja CF, Torrance J, Berthelot C, Muffato M, et al. The zebrafish  
449 reference genome sequence and its relationship to the human genome. *Nature*. 2013;496(7446):498-  
450 503.
- 451 5. Ahmad F, Noldus LPJJ, Tegelenbosch RAJ, Richardson MK. Zebrafish embryos and larvae in  
452 behavioural assays. *Behaviour*. 2012;149(10-12):1241-81.
- 453 6. Fleisch VC, Neuhauss SC. Visual behavior in zebrafish. *Zebrafish*. 2006;3(2):191-201.
- 454 7. Haug MF, Biehlmaier O, Mueller KP, Neuhauss SC. Visual acuity in larval zebrafish: behavior  
455 and histology. *Front Zool*. 2010;7:8.
- 456 8. Richendrfer H, Pelkowski SD, Colwill RM, Creton R. On the edge: Pharmacological evidence  
457 for anxiety-related behavior in zebrafish larvae. *Behav Brain Res*. 2012;228(1):99-106.
- 458 9. Ali S, van Mil HGJ, Richardson MK. Large-Scale Assessment of the Zebrafish Embryo as a  
459 Possible Predictive Model in Toxicity Testing. *PLoS One*. 2011;6(6).
- 460 10. Fraysse B, Mons R, Garric J. Development of a zebrafish 4-day embryo-larval bioassay to  
461 assess toxicity of chemicals. *Ecotox Environ Safe*. 2006;63(2):253-67.
- 462 11. McGrath P, Li CQ. Zebrafish: a predictive model for assessing drug-induced toxicity. *Drug*  
463 *Discov Today*. 2008;13(9-10):394-401.
- 464 12. Levin ED, Tanguay RL. Introduction to zebrafish: current discoveries and emerging  
465 technologies for neurobehavioral toxicology and teratology. *Neurotoxicol Teratol*. 2011;33(6):607.
- 466 13. Reiter L. An introduction to neurobehavioral toxicology. *Environ Health Perspect*. 1978;26:5-  
467 7.

- 468 14. McCollum CW, Ducharme NA, Bondesson M, Gustafsson JA. Developmental toxicity  
469 screening in zebrafish. *Birth Defects Res C Embryo Today*. 2011;93(2):67-114.
- 470 15. Barros TP, Alderton WK, Reynolds HM, Roach AG, Berghmans S. Zebrafish: an emerging  
471 technology for in vivo pharmacological assessment to identify potential safety liabilities in early drug  
472 discovery. *Br J Pharmacol*. 2008;154(7):1400-13.
- 473 16. Bowman TV, Zon LI. Swimming into the future of drug discovery: in vivo chemical screens in  
474 zebrafish. *ACS Chem Biol*. 2010;5(2):159-61.
- 475 17. Macrae CA. Cardiac Arrhythmia: In vivo screening in the zebrafish to overcome complexity in  
476 drug discovery. *Expert Opin Drug Discov*. 2010;5(7):619-32.
- 477 18. Ali S, Champagne DL, Spaink HP, Richardson MK. Zebrafish Embryos and Larvae: A New  
478 Generation of Disease Models and Drug Screens. *Birth Defects Research Part C-Embryo Today-  
479 Reviews*. 2011;93(2):115-33.
- 480 19. Guyon JR, Steffen LS, Howell MH, Pusack TJ, Lawrence C, Kunkel LM. Modeling human muscle  
481 disease in zebrafish. *Biochimica Et Biophysica Acta-Molecular Basis of Disease*. 2007;1772(2):205-15.
- 482 20. Newman M, Verdile G, Martins RN, Lardelli M. Zebrafish as a tool in Alzheimer's disease  
483 research. *Biochim Biophys Acta*. 2010.
- 484 21. Xia W. Exploring Alzheimer's disease in zebrafish. *J Alzheimers Dis*. 2010;20(4):981-90.
- 485 22. Ducharme NA, Peterson LE, Benfenati E, Reif D, McCollum CW, Gustafsson JA, et al. Meta-  
486 analysis of toxicity and teratogenicity of 133 chemicals from zebrafish developmental toxicity studies.  
487 *Reprod Toxicol*. 2013.
- 488 23. Vittozzi L, De Angelis G. A critical review of comparative acute toxicity data on freshwater  
489 fish. *Aquat Toxicol*. 1991;19(3):167-204.
- 490 24. Alsop D, Wood CM. Metal and pharmaceutical mixtures: Is ion loss the mechanism  
491 underlying acute toxicity and widespread additive toxicity in zebrafish? *Aquat Toxicol*. 2013;140-  
492 141C:257-67.
- 493 25. Eimon PM, Rubinstein AL. The use of in vivo zebrafish assays in drug toxicity screening. *Expert  
494 Opin Drug Metab Toxicol*. 2009;5(4):393-401.

- 495 26. Rubinstein AL. Zebrafish assays for drug toxicity screening. *Expert Opin Drug Metab Toxicol.*  
496 2006;2(2):231-40.
- 497 27. Hill AJ, Teraoka H, Heideman W, Peterson RE. Zebrafish as a model vertebrate for  
498 investigating chemical toxicity. *Toxicol Sci.* 2005;86(1):6-19.
- 499 28. Lieschke GJ, Currie PD. Animal models of human disease: zebrafish swim into view. *Nat Rev*  
500 *Genet.* 2007;8(5):353-67.
- 501 29. Zon LI. Zebrafish: a new model for human disease. *Genome Res.* 1999;9(2):99-100.
- 502 30. Ahmad F, Richardson MK. Exploratory behaviour in the open field test adapted for larval  
503 zebrafish: Impact of environmental complexity. *Behav Processes.* 2013;92:88-98.
- 504 31. Prut L, Belzung C. The open field as a paradigm to measure the effects of drugs on anxiety-  
505 like behaviors: a review. *Eur J Pharmacol.* 2003;463(1-3):3-33.
- 506 32. Krauss A, Neumeier C. Wavelength dependence of the optomotor response in zebrafish  
507 (*Danio rerio*). *Vision Res.* 2003;43(11):1273-82.
- 508 33. Brockerhoff SE. Measuring the optokinetic response of zebrafish larvae. *Nat Protoc.*  
509 2006;1(5):2448-51.
- 510 34. Brockerhoff SE, Hurley JB, Neuhauss S, Driever W, Dowling JE. Optokinetic Responses in Wild-  
511 Type and Mutant Larval Zebrafish. *Invest Ophthalmol Vis Sci.* 1995;36(4):S918-S.
- 512 35. Huang YY, Neuhauss SCF. The optokinetic response in zebrafish and its applications. *Frontiers*  
513 *in Bioscience-Landmark.* 2008;13:1899-916.
- 514 36. Qian H, Zhu Y, Ramsey DJ, Chappell RL, Dowling JE, Ripps H. The optokinetic response of  
515 larval zebrafish. *Invest Ophthalmol Vis Sci.* 2005;46.
- 516 37. Zou SQ, Yin W, Zhang MJ, Hu CR, Huang YB, Hu B. Using the optokinetic response to study  
517 visual function of zebrafish. *J Vis Exp.* 2010(36).
- 518 38. Ali S, Champagne DL, Richardson MK. Behavioral profiling of zebrafish embryos exposed to a  
519 panel of 60 water-soluble compounds. *Behav Brain Res.* 2012;228(2):272-83.

- 520 39. Emran F, Rihel J, Adolph AR, Dowling JE. Zebrafish larvae lose vision at night. *Proc Natl Acad*  
521 *Sci U S A*. 2010;107(13):6034-9.
- 522 40. Emran F, Rihel J, Dowling JE. A behavioral assay to measure responsiveness of zebrafish to  
523 changes in light intensities. *J Vis Exp*. 2008(20).
- 524 41. Werboff J, Dembicki EL. Toxic Effects of Tranquilizers Administered to Gravid Rats. *J*  
525 *Neuropsychiatry*. 1962;4(2):87-91.
- 526 42. Rihel J, Prober DA, Arvanites A, Lam K, Zimmerman S, Jang S, et al. Zebrafish behavioral  
527 profiling links drugs to biological targets and rest/wake regulation. *Science*. 2010;327(5963):348-51.
- 528 43. Rihel J, Schier AF. Behavioral screening for neuroactive drugs in zebrafish. *Dev Neurobiol*.  
529 2012;72(3):373-85.
- 530 44. Boulet SL, Boyle CA, Schieve LA. Health Care Use and Health and Functional Impact of  
531 Developmental Disabilities Among US Children, 1997-2005. *Arch Pediat Adol Med*. 2009;163(1):19-  
532 26.
- 533 45. Hass U. The need for developmental neurotoxicity studies in risk assessment for  
534 developmental toxicity. *Reprod Toxicol*. 2006;22(2):148-56.
- 535 46. Ton C, Lin YX, Willett C. Zebrafish as a model for developmental neurotoxicity testing. *Birth*  
536 *Defects Research Part a-Clinical and Molecular Teratology*. 2006;76(7):553-67.
- 537 47. Vaughan M, van Egmond R. The use of the zebrafish (*Danio rerio*) embryo for the acute  
538 toxicity testing of surfactants, as a possible alternative to the acute fish test. *Altern Lab Anim*.  
539 2010;38(3):231-8.
- 540 48. van der Werf HMG. Assessing the impact of pesticides on the environment. *Agriculture,*  
541 *Ecosystems & Environment*. 1996;60(2-3):81-96.
- 542 49. Kamrin MA. Pesticide profiles : toxicity, environmental impact, and fate. Boca Raton, FL:  
543 CRC/Lewis Publishers; 1997. 676 p. p.
- 544 50. Vignet C, Begout ML, Pean S, Lyphout L, Leguay D, Cousin X. Systematic screening of  
545 behavioral responses in two zebrafish strains. *Zebrafish*. 2013;10(3):365-75.
- 546 51. Nusslein-Volhard C, Dahm R. *Zebrafish*: OUP Oxford; 2002.

- 547 52. Beker van Woudenberg A, Wolterbeek A, Te Brake L, Snel C, Menke A, Rubingh C, et al. A  
548 category approach to predicting the developmental (neuro) toxicity of organotin compounds: the  
549 value of the zebrafish (*Danio rerio*) embryotoxicity test (ZET). *Reprod Toxicol*. 2013;41:35-44.
- 550 53. Agency USEP. Ecological Effects Test Guidelines: OPPTS 850.1075: Fish Acute Toxicity Test,  
551 Freshwater and Marine. 1996.
- 552 54. Kimmel CB, Ballard WW, Kimmel SR, Ullmann B, Schilling TF. Stages of Embryonic-  
553 Development of the Zebrafish. *Dev Dynam*. 1995;203(3):253-310.
- 554 55. Ali S, Champagne DL, Alia A, Richardson MK. Large-scale analysis of acute ethanol exposure in  
555 zebrafish development: a critical time window and resilience. *PLoS One*. 2011;6(5):e20037.
- 556 56. Steenbergen PJ, Richardson MK, Champagne DL. The use of the zebrafish model in stress  
557 research. *Prog Neuropsychopharmacol Biol Psychiatry*. 2011;35(6):1432-51.
- 558 57. Steenbergen PJ, Richardson MK, Champagne DL. Patterns of avoidance behaviours in the  
559 light/dark preference test in young juvenile zebrafish: a pharmacological study. *Behav Brain Res*.  
560 2011;222(1):15-25.
- 561 58. Ong KJ, Zhao X, Thistle ME, McCormack TJ, Clark RJ, Ma G, et al. Mechanistic insights into  
562 the effect of nanoparticles on zebrafish hatch. *Nanotoxicology*. 2013.
- 563 59. Sano K, Inohaya K, Kawaguchi M, Yoshizaki N, Iuchi I, Yasumasu S. Purification and  
564 characterization of zebrafish hatching enzyme - an evolutionary aspect of the mechanism of egg  
565 envelope digestion. *Febs J*. 2008;275(23):5934-46.
- 566 60. Bonsignorio D, Perego L, Del Giacco L, Cotelli F. Structure and macromolecular composition  
567 of the zebrafish egg chorion. *Zygote*. 1996;4(2):101-8.
- 568 61. Ozoh PTE. Malformations and Inhibitory Tendencies Induced to *Brachydanio-Rerio* (Hamilton-  
569 Buchanan) Eggs and Larvae Due to Exposures in Low Concentrations of Lead and Copper Ions. *Bull*  
570 *Environ Contam Toxicol*. 1979;21(4-5):668-75.
- 571 62. Dixon DG, Sprague JB. Acclimation to Copper by Rainbow-Trout (*Salmo-Gairdneri*) - a  
572 Modifying Factor in Toxicity. *Can J Fish Aquat Sci*. 1981;38(8):880-8.



- 573 63. Iwashita M, Watanabe M, Ishii M, Chen T, Johnson SL, Kurachi Y, et al. Pigment pattern in  
574 jaguar/obelix zebrafish is caused by a Kir7.1 mutation: Implications for the regulation of melanosome  
575 movement. *PLoS Genet.* 2006;2(11):1861-70.
- 576 64. Helvik JV, Walther BT. Development of Hatchability in Halibut (*Hippoglossus-Hippoglossus*)  
577 Embryos. *Int J Dev Biol.* 1993;37(3):487-90.
- 578 65. Parg C, Seng WL, Semino C, McGrath P. Zebrafish: a preclinical model for drug screening.  
579 *Assay Drug Dev Technol.* 2002;1(1 Pt 1):41-8.
- 580 66. Van Leeuwen CJ, Grootelaar EM, Niebeek G. Fish embryos as teratogenicity screens: a  
581 comparison of embryotoxicity between fish and birds. *Ecotox Environ Safe.* 1990;20(1):42-52.
- 582 67. Selderslaghs IWT, Van Rompay AR, De Coen W, Witters HE. Development of a screening assay  
583 to identify teratogenic and embryotoxic chemicals using the zebrafish embryo. *Reprod Toxicol.*  
584 2009;28(3):308-20.
- 585 68. Murphey RD, Stern HM, Straub CT, Zon LI. A chemical genetic screen for cell cycle inhibitors  
586 in zebrafish embryos. *Chem Biol Drug Des.* 2006;68(4):213-9.
- 587 69. MacPhail RC, Brooks J, Hunter DL, Padnos B, Irons TD, Padilla S. Locomotion in larval  
588 zebrafish: Influence of time of day, lighting and ethanol. *Neurotoxicology.* 2009;30(1):52-8.
- 589 70. Ahmad F, Tegelenbosch RAJ, Noldus LPJJ, Richardson MK. Zebrafish embryos and larvae in  
590 behavioural assays. *Behaviour.* 2012;149:1241-81.
- 591 71. Garg SK, Thaker AM, Verma SP, Uppal RP, Garg BD. Neurotoxic effects of pendimethalin--a  
592 weedicide. *Indian J Exp Biol.* 1987;25(7):463-6.
- 593 72. Bracy OL, Doyle RS, Kennedy M, McNally SM, Weed JD, Thorne BM. Effects of Methomyl and  
594 Ethanol on Behavior in the Sprague-Dawley Rat. *Pharmacol Biochem Be.* 1979;10(1):21-5.
- 595 73. Ossowska K, Smialowska M, Kuter K, Wieronska J, Zieba B, Wardas J, et al. Degeneration of  
596 dopaminergic mesocortical neurons and activation of compensatory processes induced by a long-  
597 term paraquat administration in rats: Implications for Parkinson's disease. *Neuroscience.*  
598 2006;141(4):2155-65.
- 599 74. Bretaud S, Lee S, Guo S. Sensitivity of zebrafish to environmental toxins implicated in  
600 Parkinson's disease. *Neurotoxicol Teratol.* 2004;26(6):857-64.

- 601 75. Hinman DJ. Biphasic dose-response relationship for effects of toluene inhalation on  
602 locomotor activity. *Pharmacol Biochem Behav.* 1987;26(1):65-9.
- 603 76. Gingras MA, Cools AR. Analysis of the biphasic locomotor response to ethanol in high and low  
604 responders to novelty: a study in Nijmegen Wistar rats. *Psychopharmacology (Berl).* 1996;125(3):258-  
605 64.
- 606 77. Addendum to the Final Report on the Safety Assessment of Hydroquinone. *J Am Coll Toxicol.*  
607 1994;13(3):167-230.
- 608 78. Bernard PA, Toyoshima E, Eccles CU, Mayer RF, Johnson KP, Max SR. 2,4-  
609 Dichlorophenoxyacetic Acid (2,4-D) Reduces Acetylcholinesterase Activity in Rat Muscle. *Exp Neurol.*  
610 1985;87(3):544-56.
- 611 79. Padilla S, Hunter DL, Padnos B, Frady S, MacPhail RC. Assessing locomotor activity in larval  
612 zebrafish: Influence of extrinsic and intrinsic variables. *Neurotoxicol Teratol.* 2011;33(6):624-30.
- 613 80. Dell'Omo G, Pleskacheva MG, Wolfer DP, Lipp HP, Shore RF. Comparative effects of exposure  
614 to an organophosphate pesticide on locomotor activity of laboratory mice and five species of wild  
615 rodents. *Bull Environ Contam Toxicol.* 2003;70(1):138-45.
- 616 81. De Gori N, Froio F, Strongoli MC, De Francesco A, Calo M, Nistico G. Behavioural and  
617 electrocortical changes induced by paraquat after injection in specific areas of the brain of the rat.  
618 *Neuropharmacology.* 1988;27(2):201-7.
- 619 82. Morato GS, Lemos T, Takahashi RN. Acute exposure to maneb alters some behavioral  
620 functions in the mouse. *Neurotoxicol Teratol.* 1989;11(5):421-5.
- 621

### A. Mercuric chloride

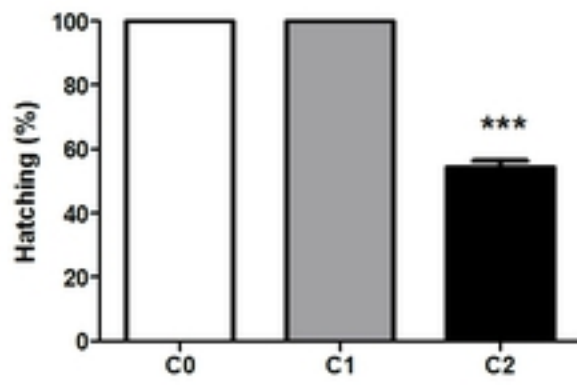

### B. Maneb

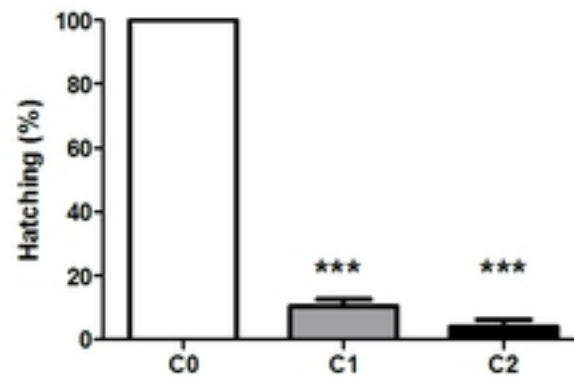

### C. Acephate

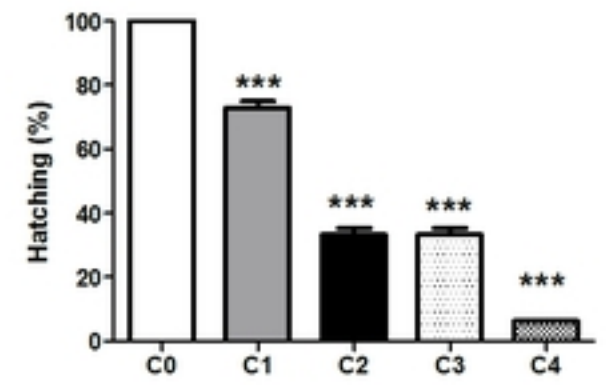

### D. Gallium chloride

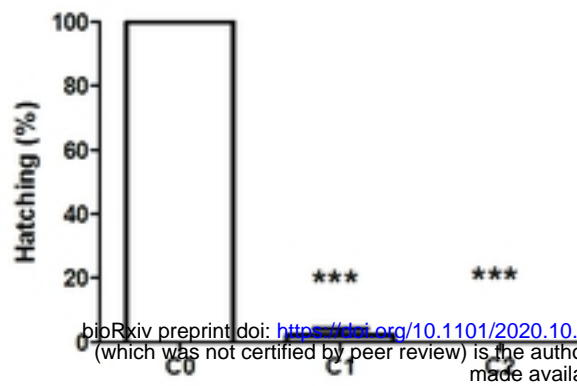

### E. Erbium chloride

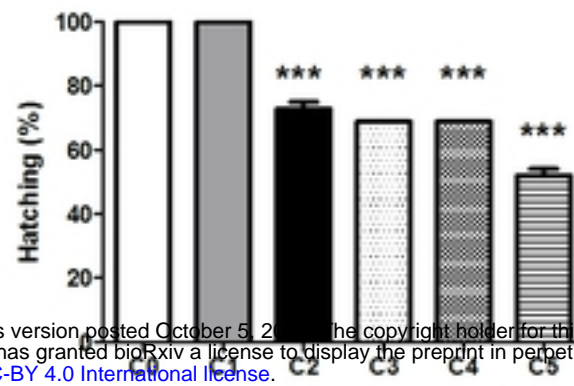

### F. Diazinon

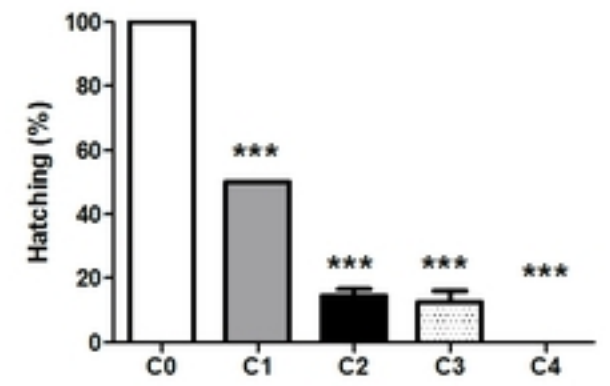

### G. Molinate

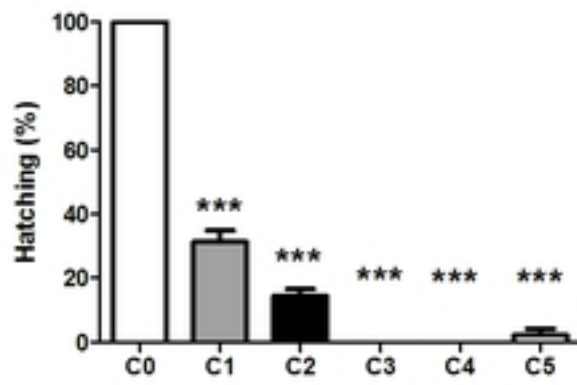

### H. Bromacil

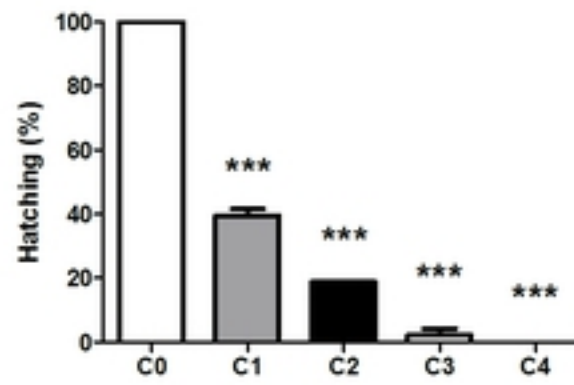

### I. Zinc chloride

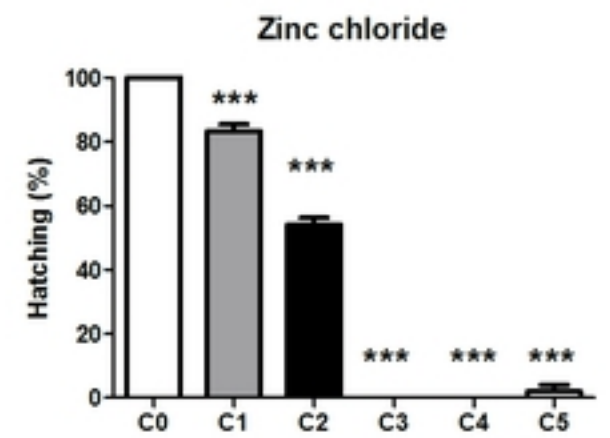

### J. Stannic chloride

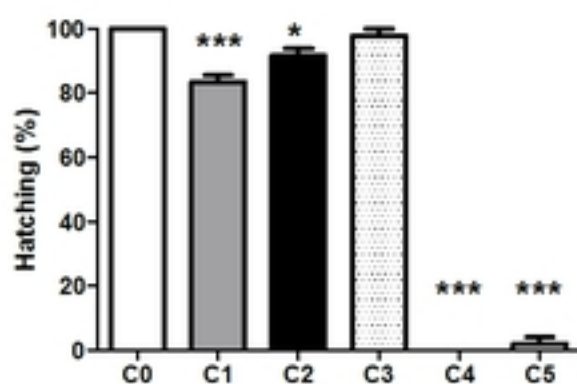

### K. Pendimethalin

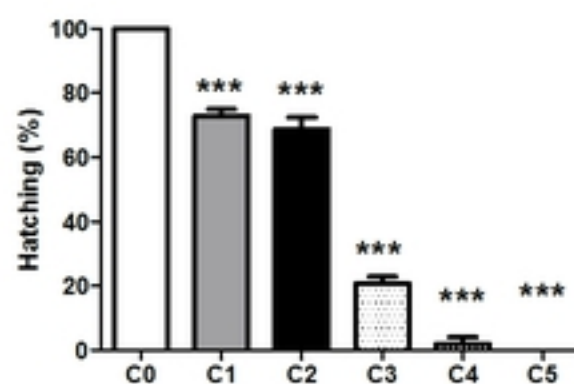

### L. Triclypyr

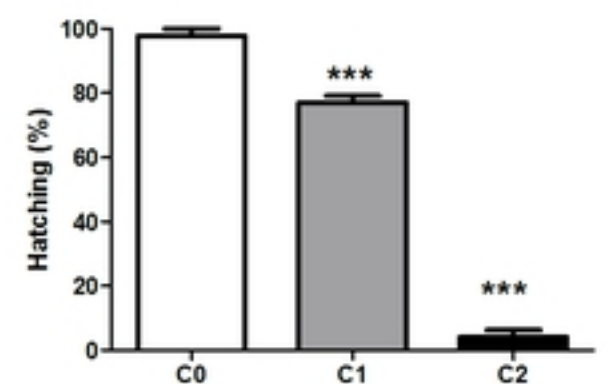

### L. Benzophenone

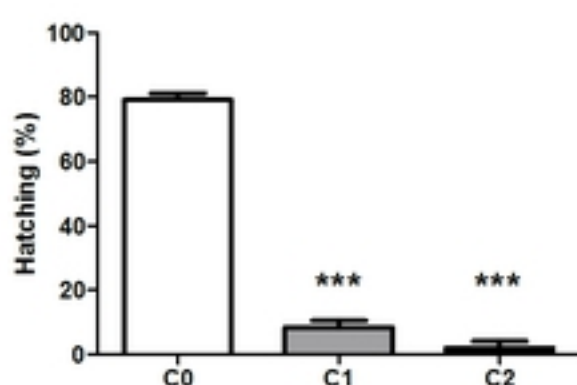

### M. Dimethoate

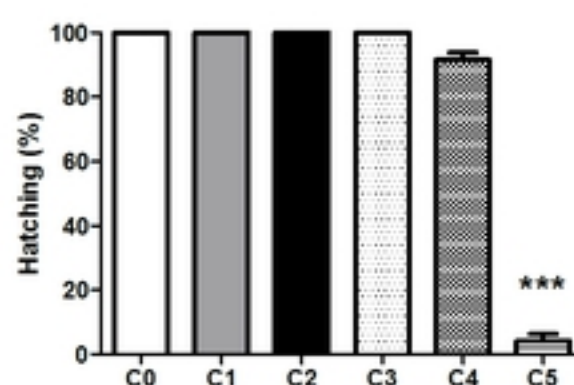

### N. Hydroquinone

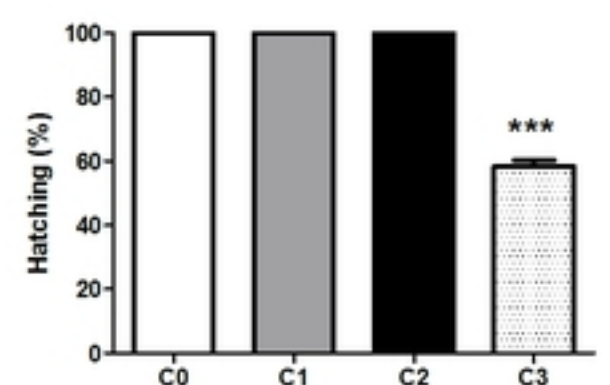

Figure 1

### A. Amitrol

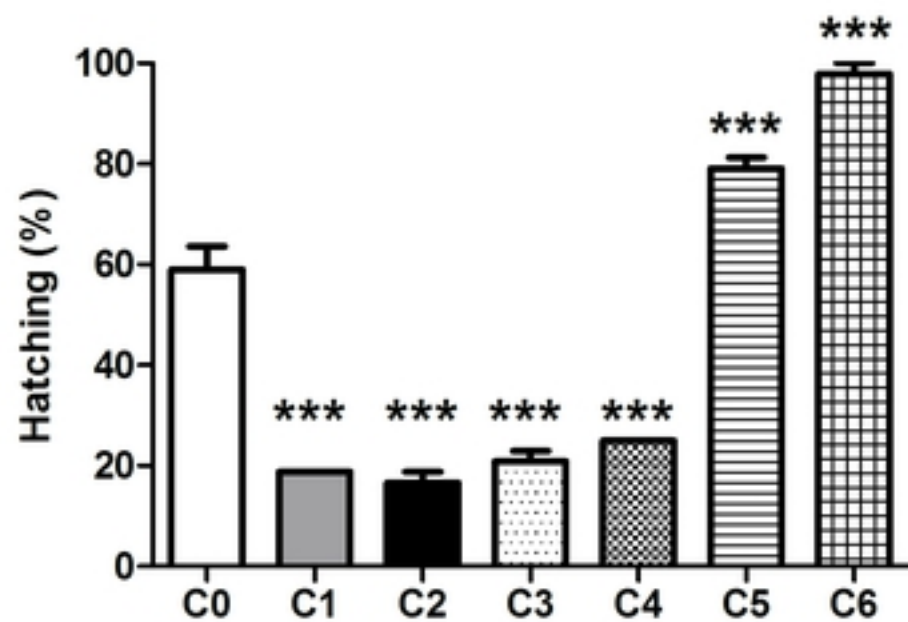

### B. Methomyl

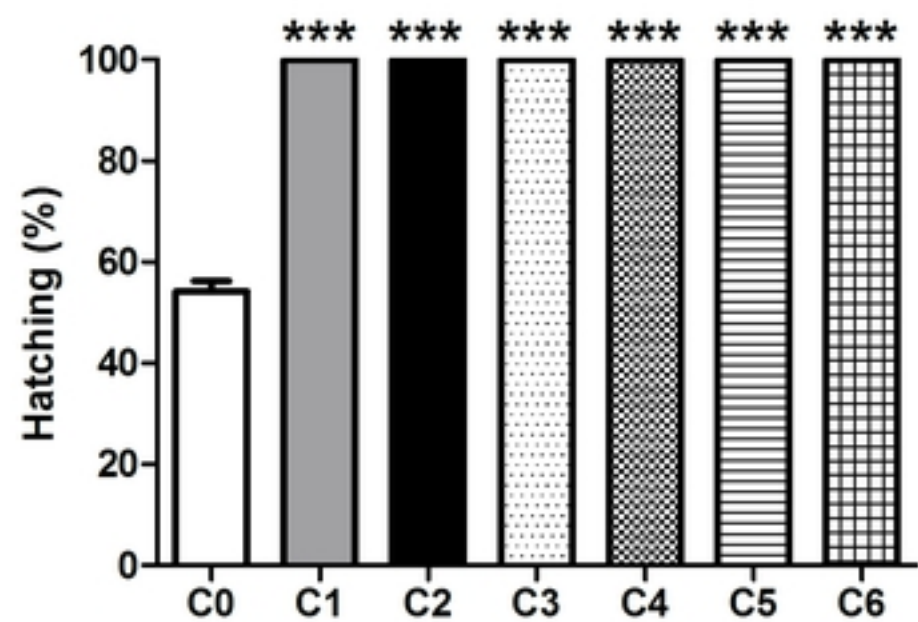

### C. Paraquat

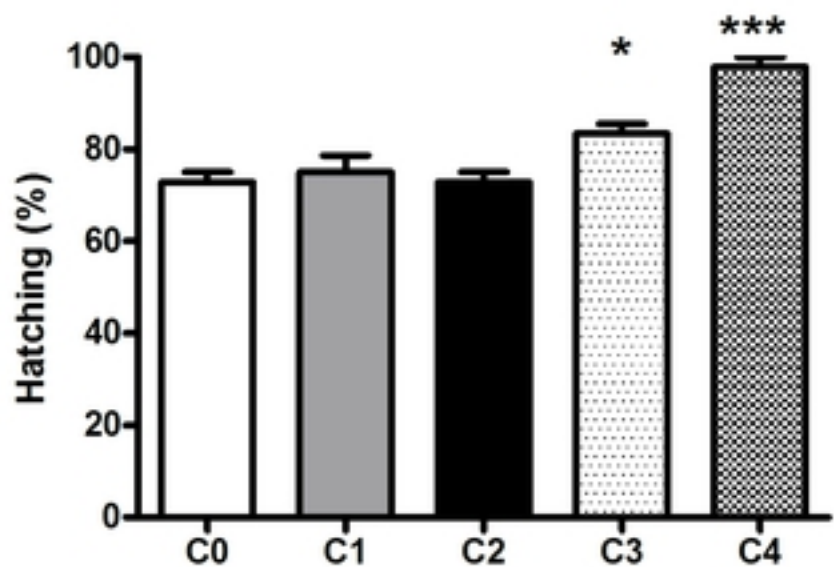

### D. Glyphosate

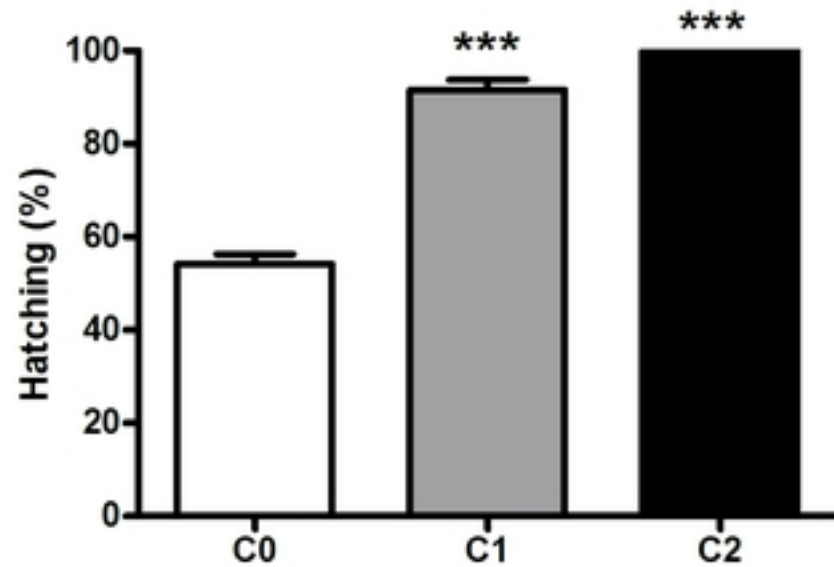

Figure 2

### A. MCPA

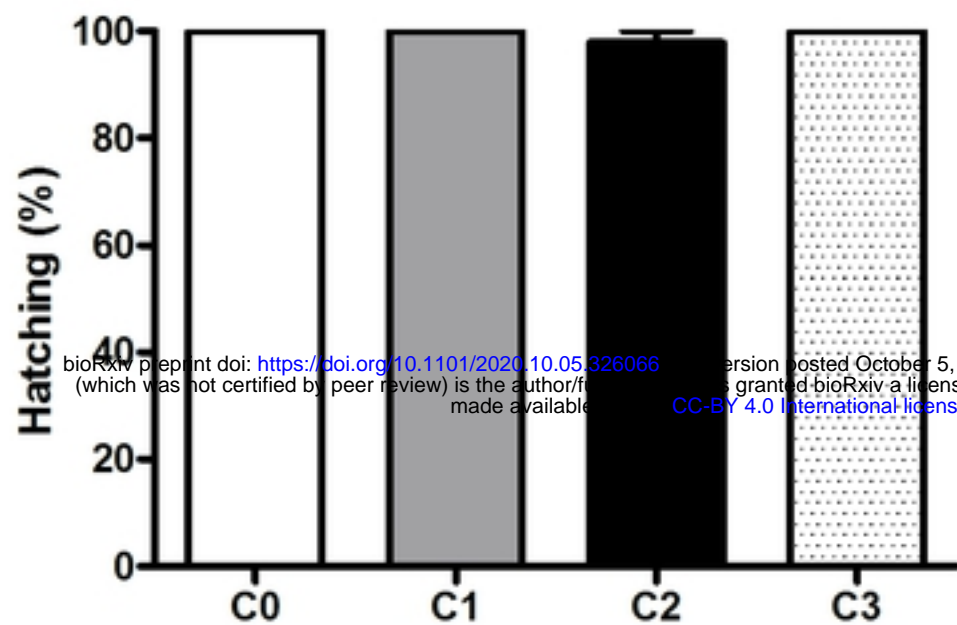

### B. 2,4-D

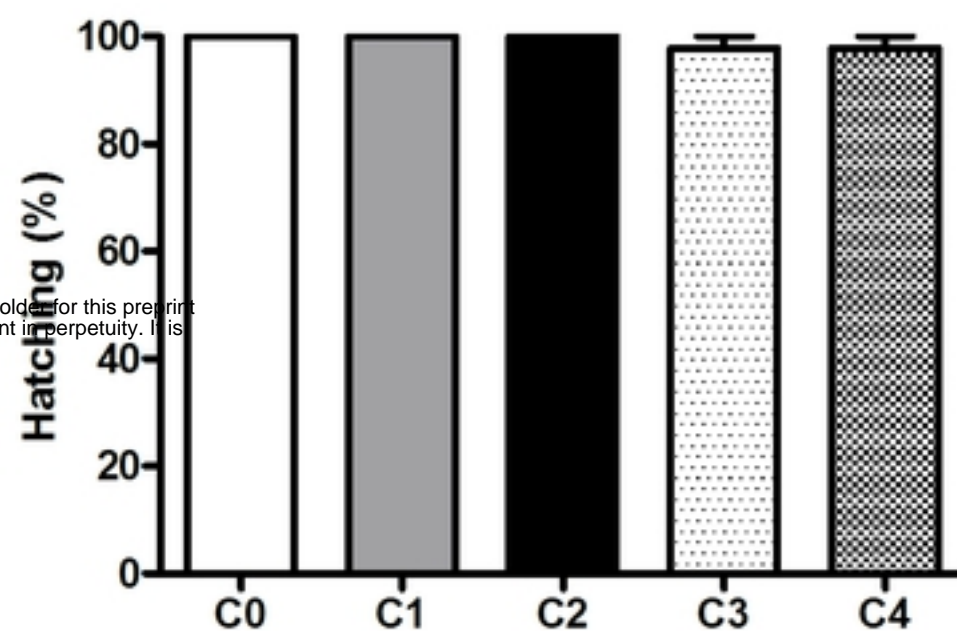

### C. Hexazinone

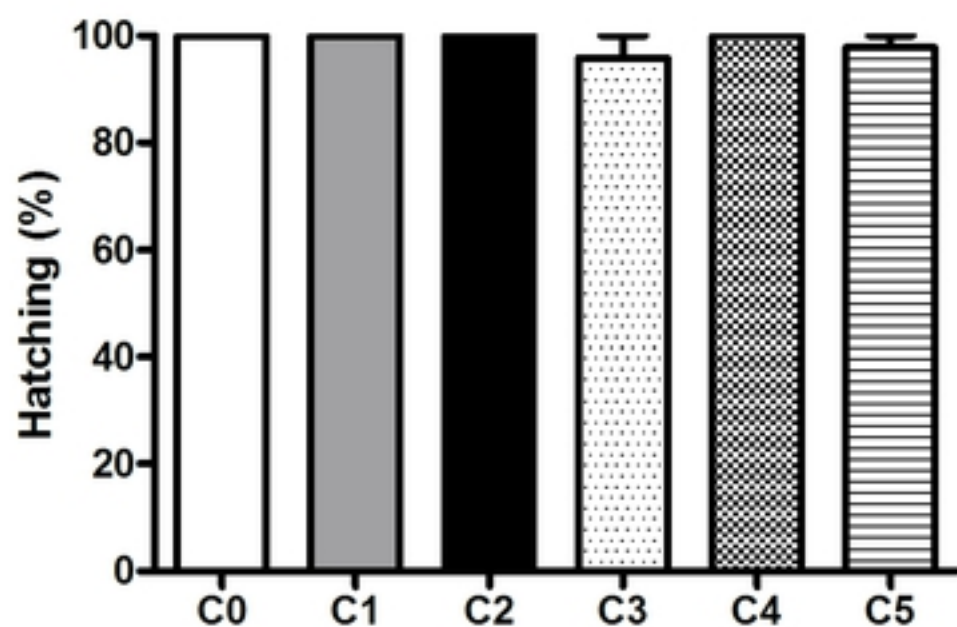

### D. Barium chloride

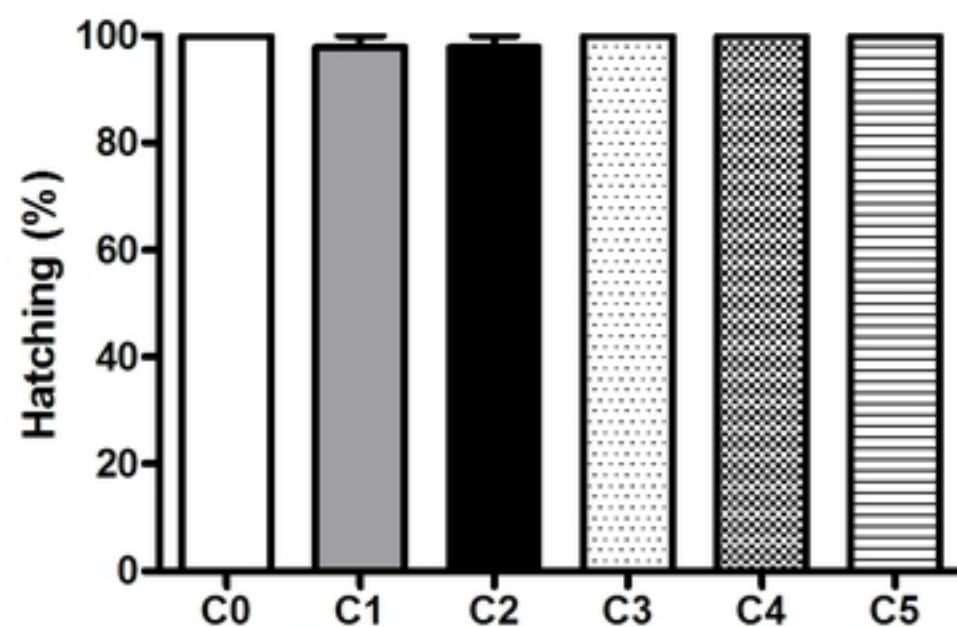

### E. Strontium Chloride

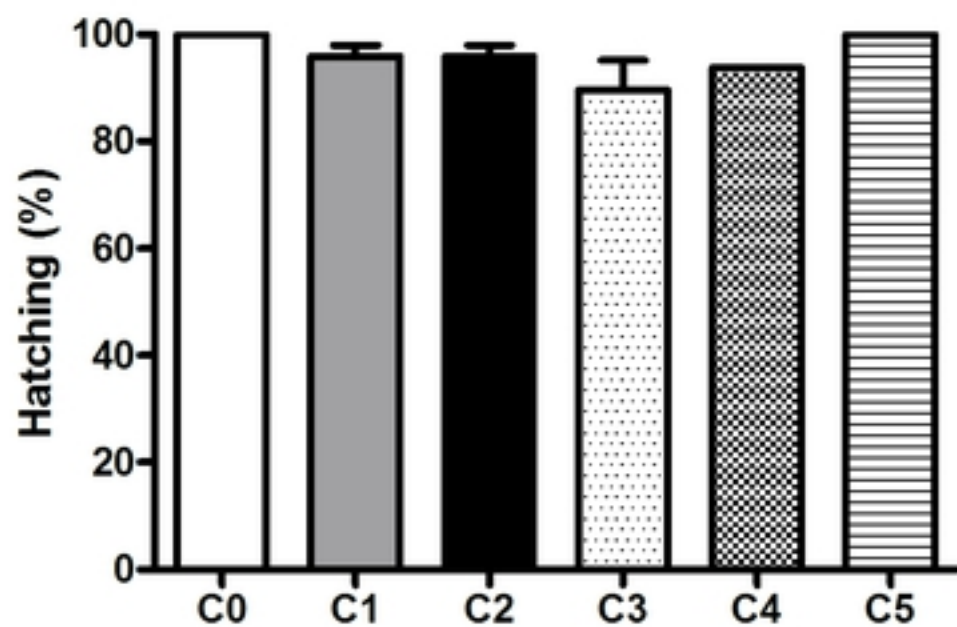

Figure 3

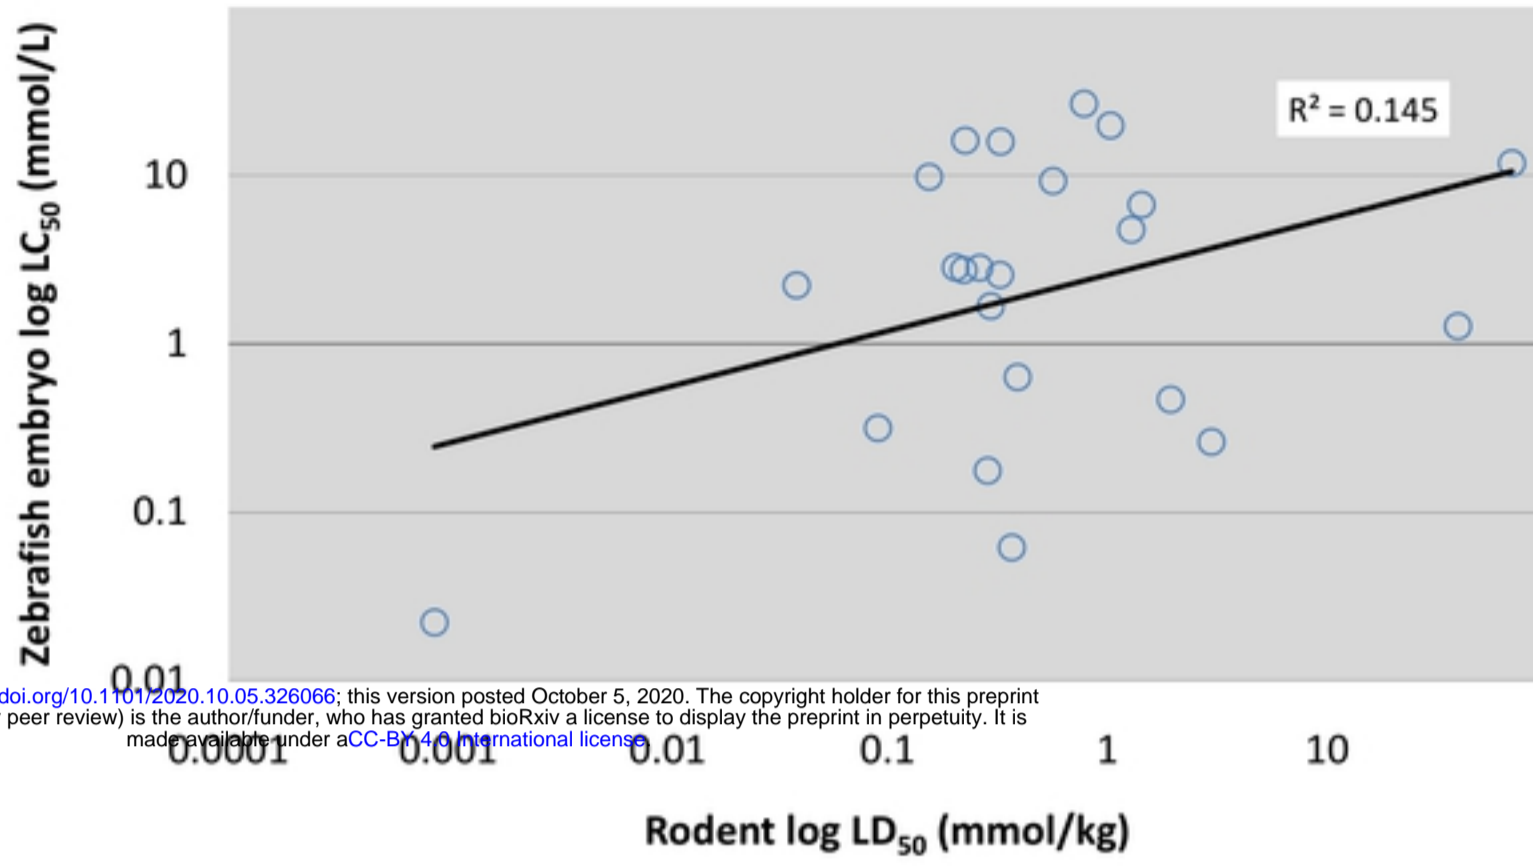

1

## A. Paraquat

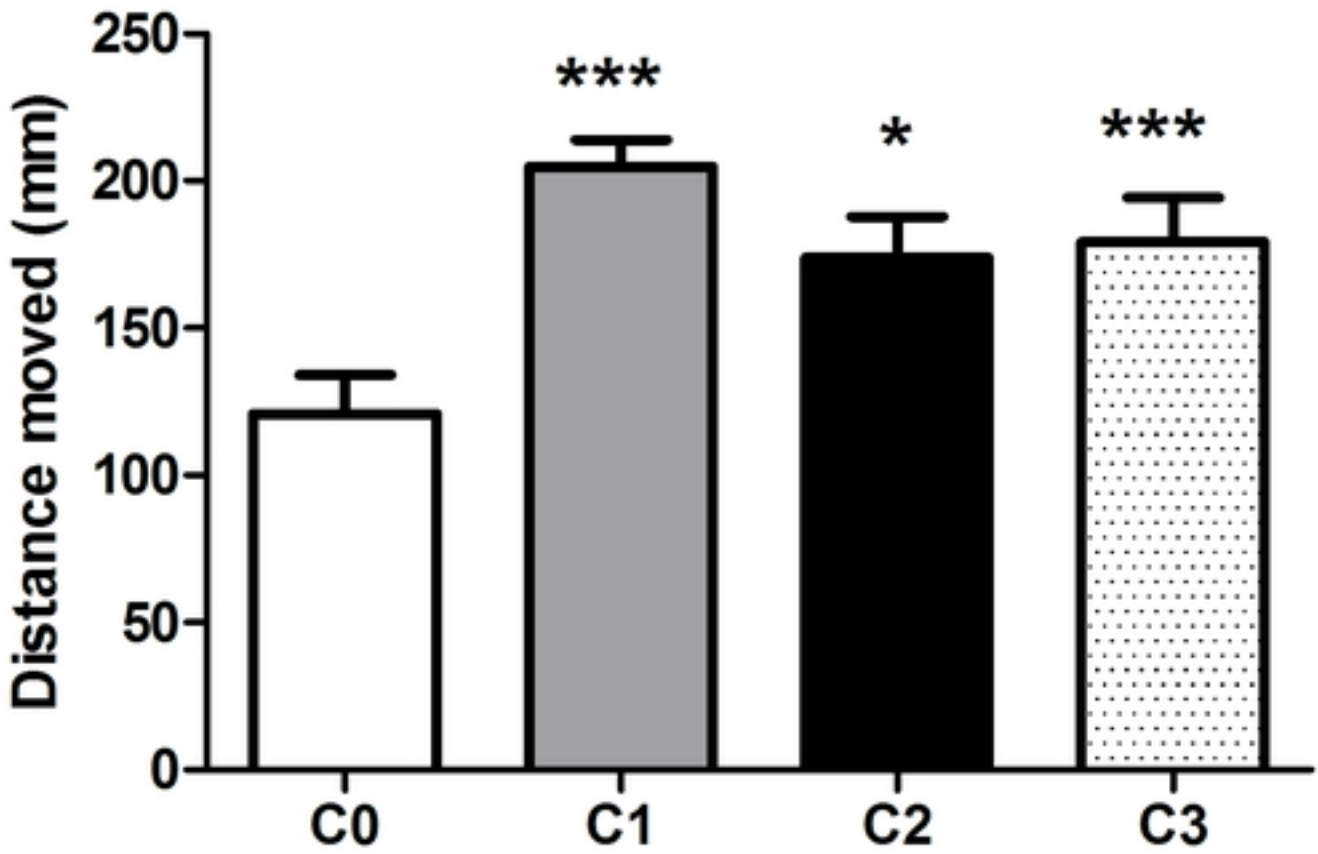

## B. Amitrol

bioRxiv preprint doi: <https://doi.org/10.1101/2020.10.05.326066>; this version posted October 5, 2020. The copyright holder for this preprint (which was not certified by peer review) is the author/funder, who has granted bioRxiv a license to display the preprint in perpetuity. It is made available under aCC-BY 4.0 International license.

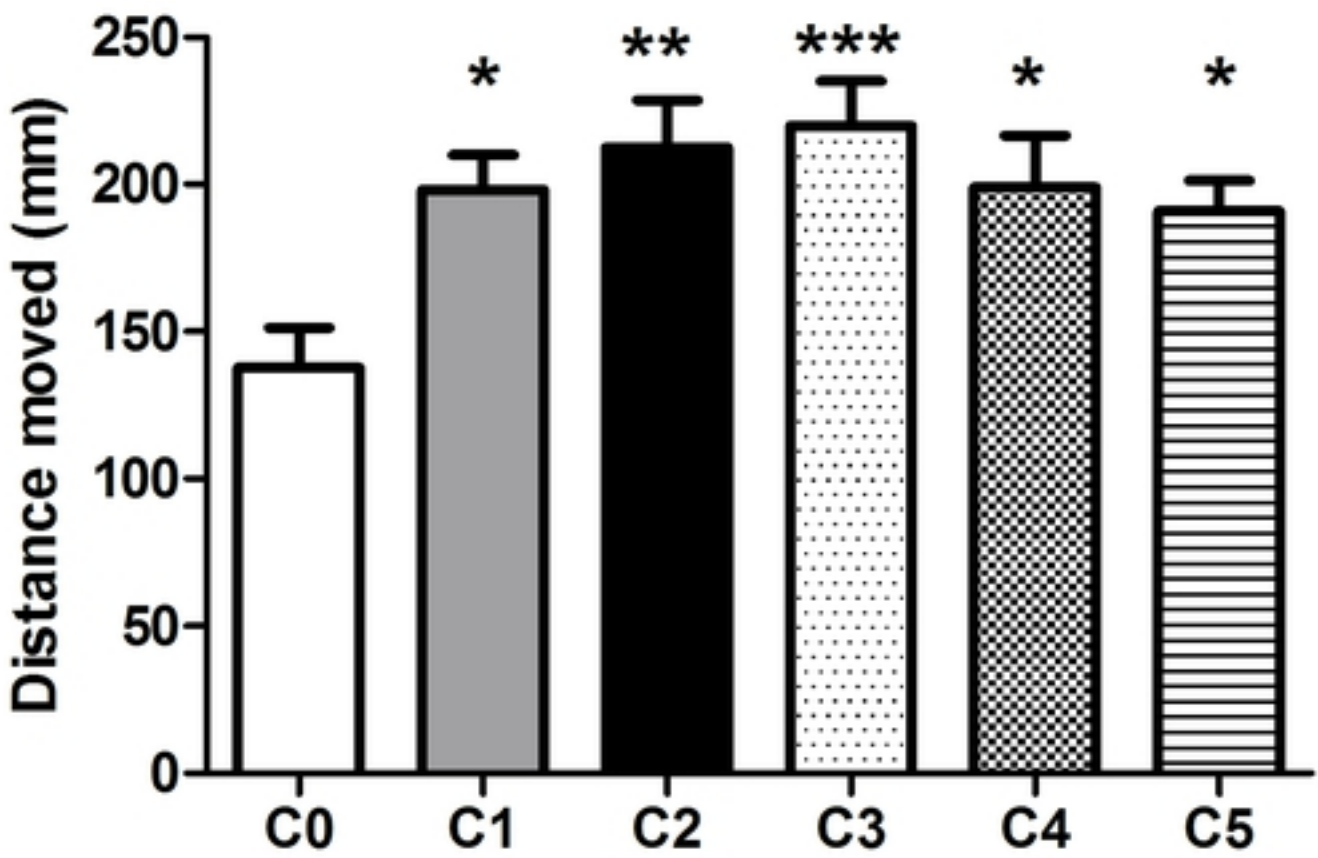

## C. Stannic chloride

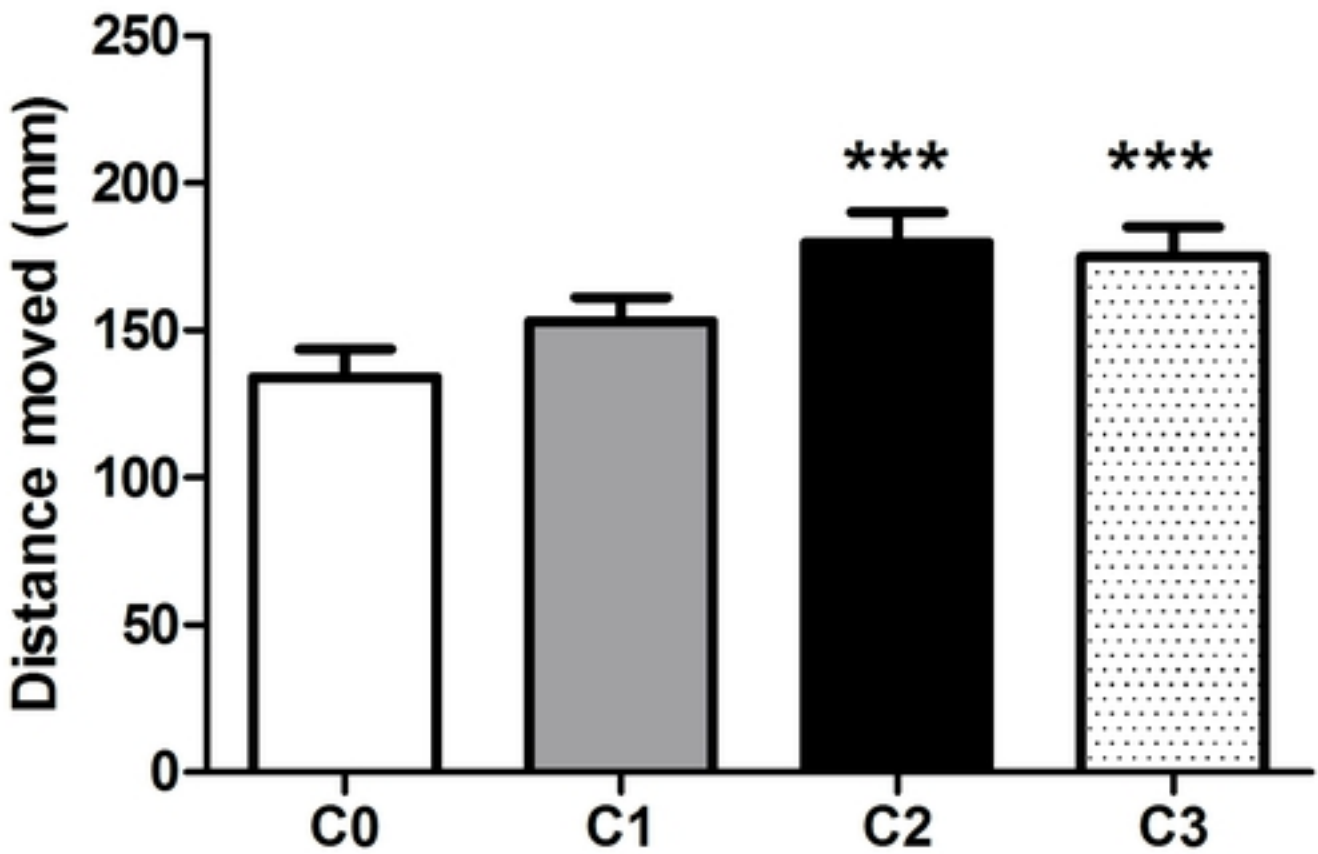

Figure 5

## A. Strontium chloride

bioRxiv preprint doi: <https://doi.org/10.1101/2020.10.05.326066>; this version posted October 5, 2020. The copyright holder for this preprint (which was not certified by peer review) is the author/funder, who has granted bioRxiv a license to display the preprint in perpetuity. It is made available under aCC-BY 4.0 International license.

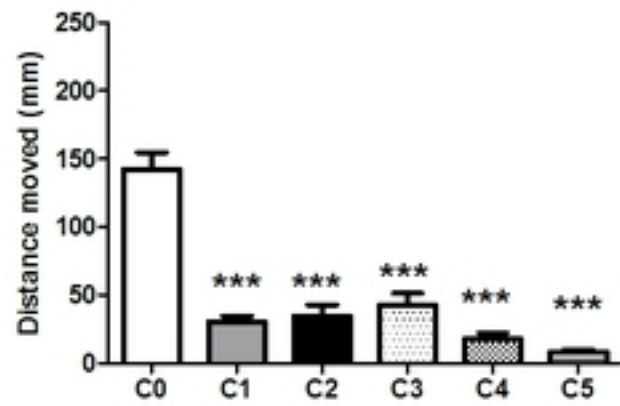

## B. Pendimethalin

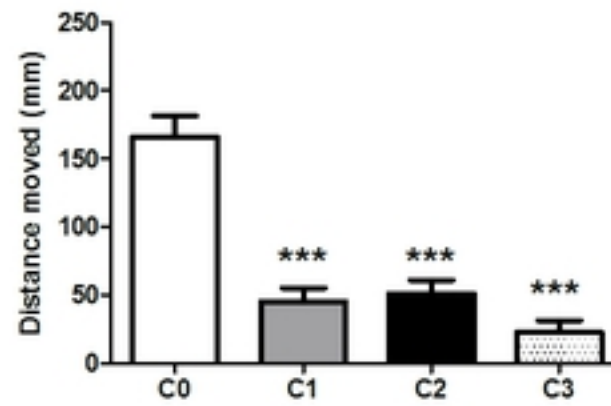

## C. Diazinone

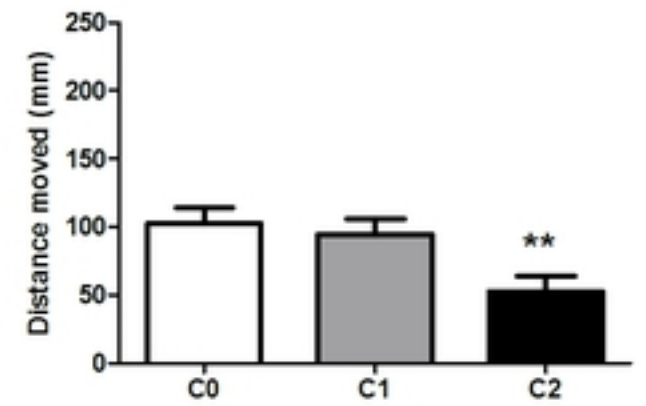

## D. Hexazinone

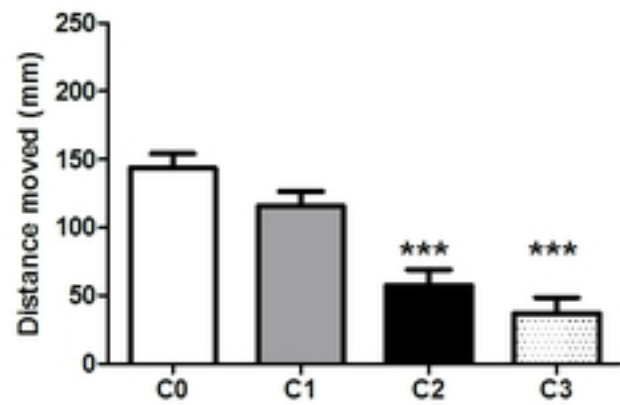

## E. Methomyl

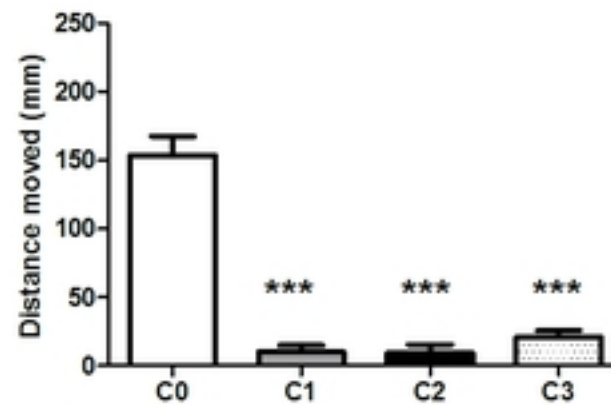

## F. Molinate

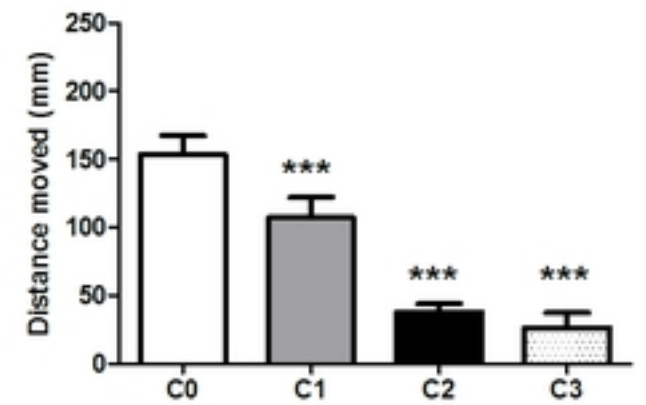

## G. Dimethoate

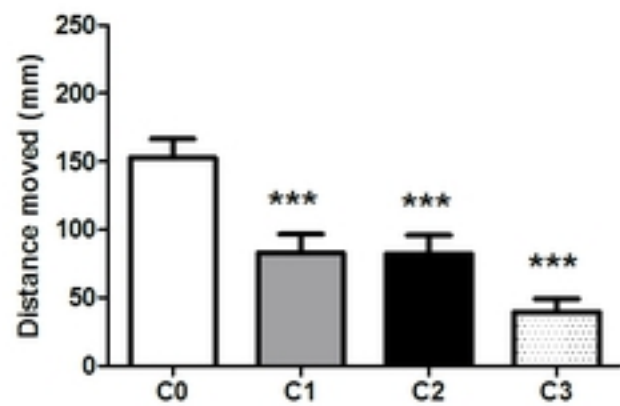

## H. Barium chloride

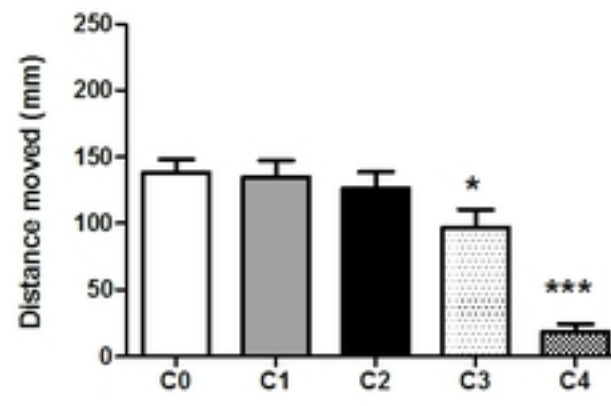

## I. Zinc chloride

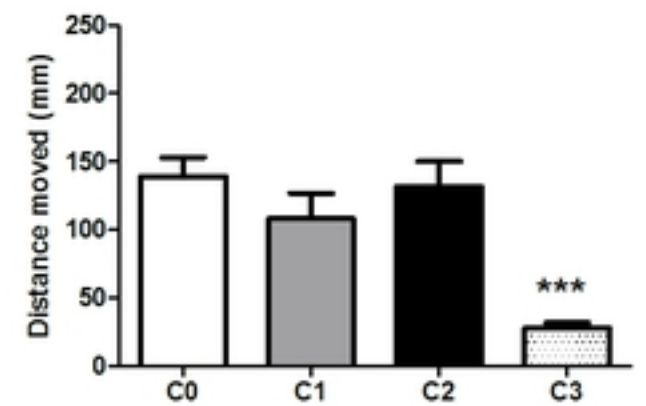

Figure 6



## A. Erbium chloride

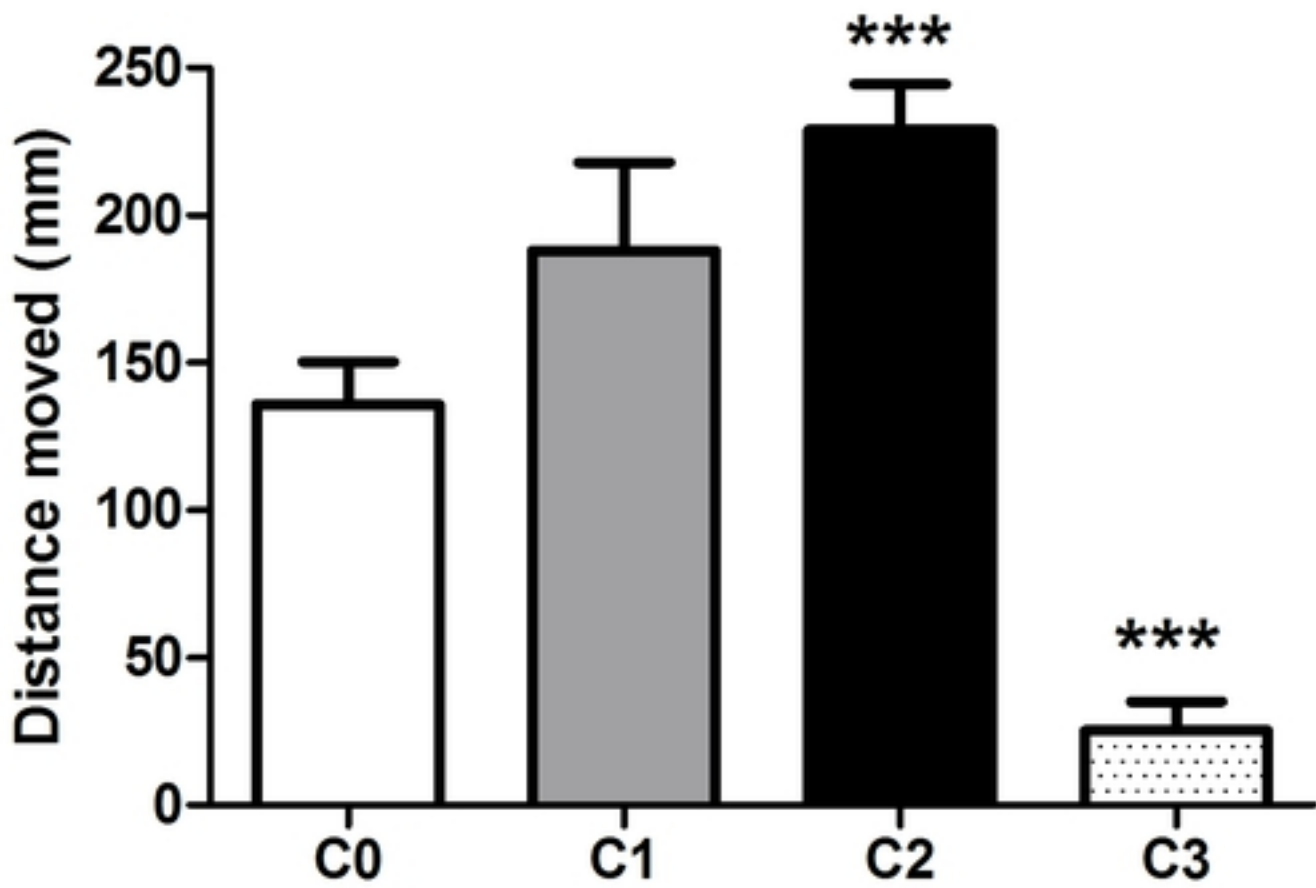

## B. Hydroquinone

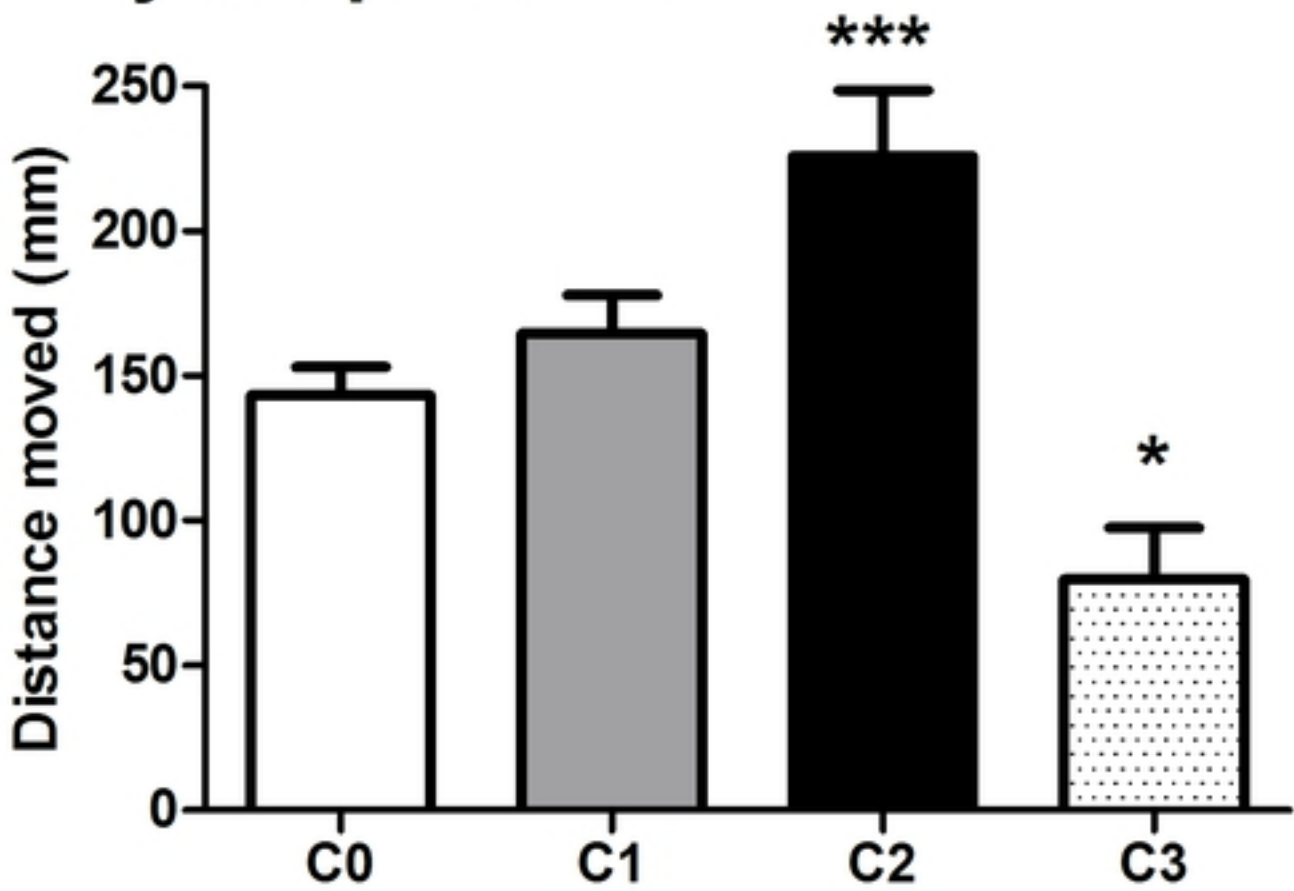

## C. 2,4-D

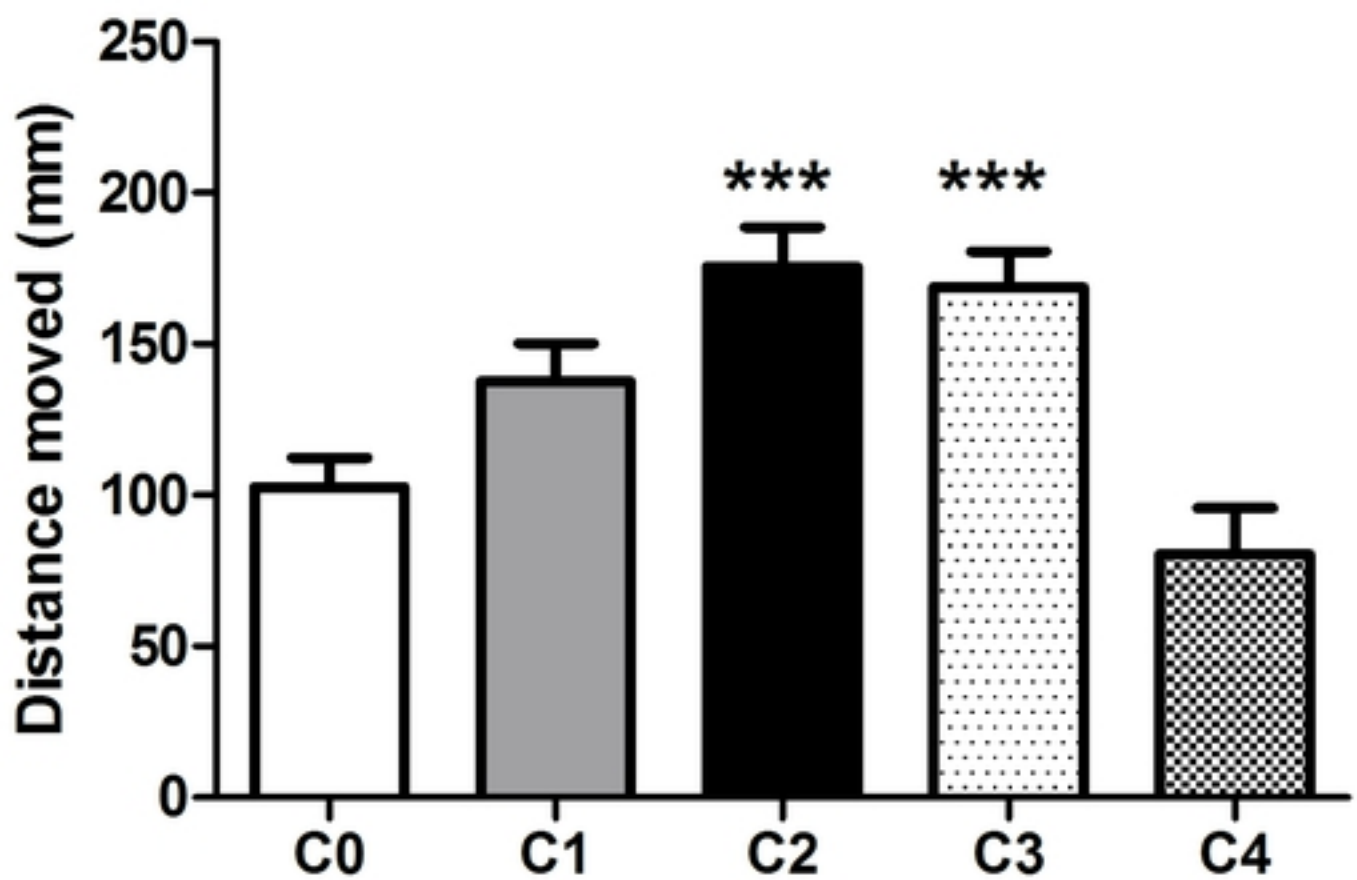

Figure 7

### A. Maneb

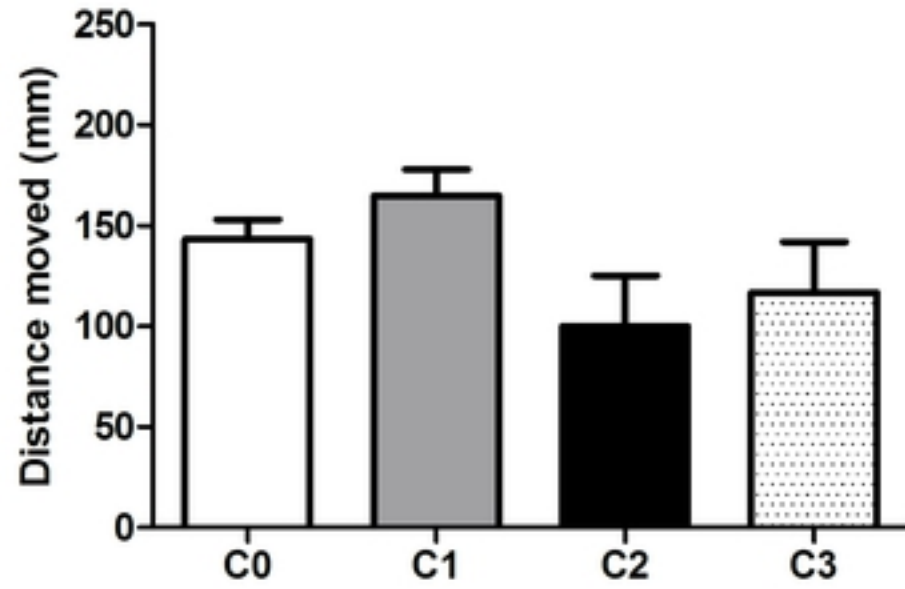

### B. Glyphosate

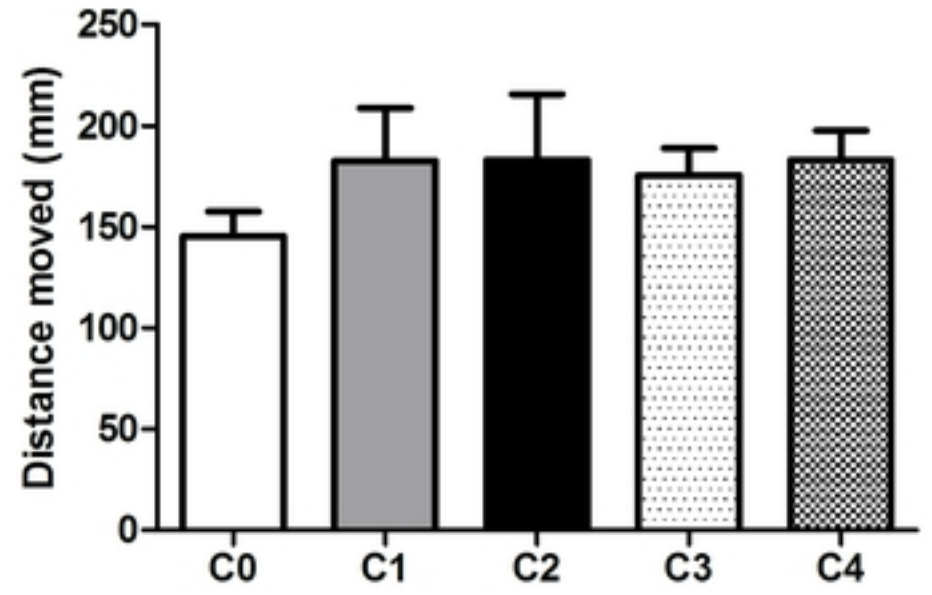

### C. MCPA

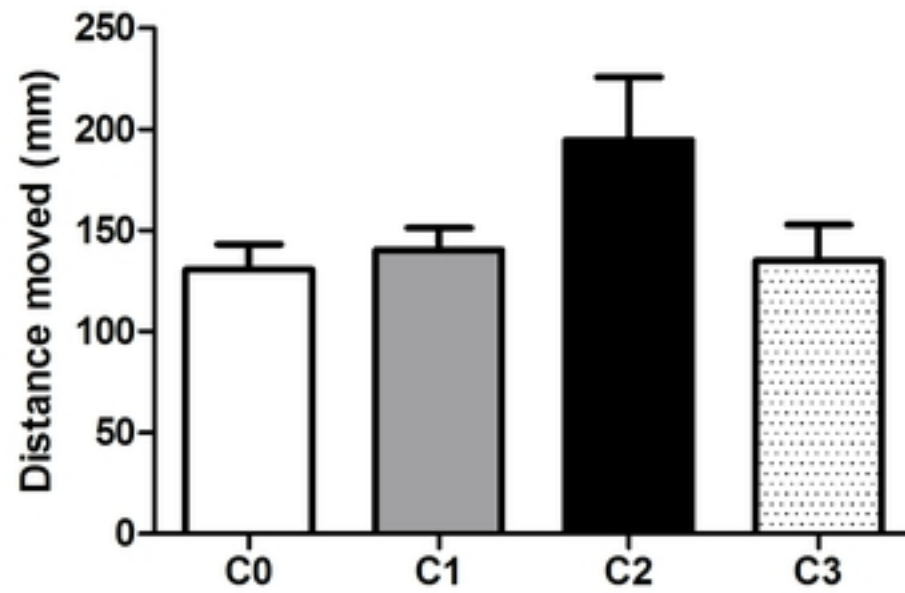

### D. Bromacil

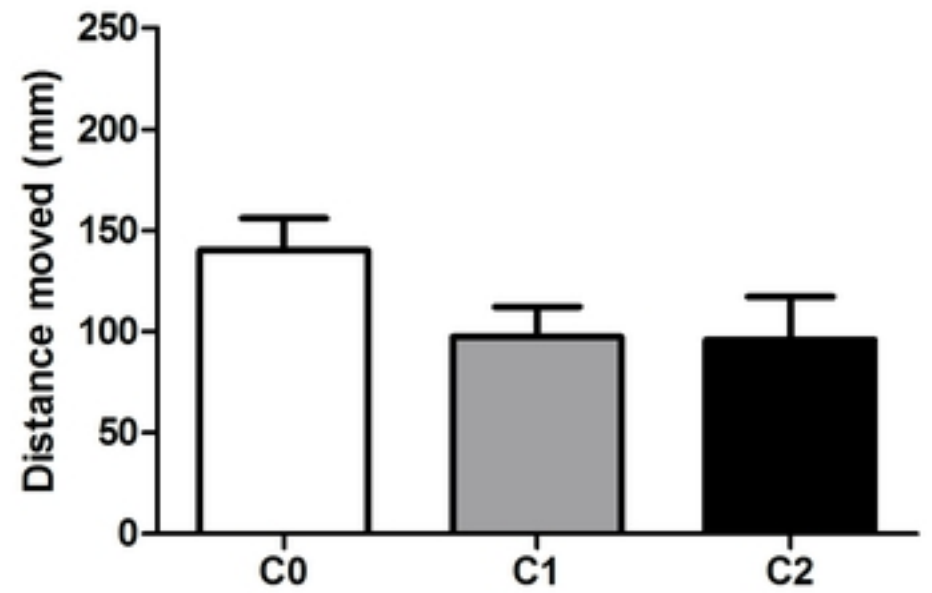

Figure 8
